# Supplementary material
Source: Research Square preprint supplement (doi:10.21203/rs.3.rs-9685219/v1)
Supplement: Supplementary file 1 [file 1ac99d283a9a04181ba906ee.xlsx]

## Sheet: Sheet1
Table S2. List of disease-related missense mutations in human ColVI proteins.
Gene	Mutation	Disease	Reference	Predicted effect
Human COL6A1	L38R	Bethlem myopathy	Stehlíková (2017) Clin Genet 91, 463	Disrupting N1 domain folding
	D43A	Neuropathy	Abouelhoda (2016) Genet Med 18, 1244	Disrupting Magnesium coordination
	E46D	Muscular dystrophy, limb girdle 1A ?	Nallamilli (2018) Ann Clin Transl Neurol 5, 1574	Disrupting Magnesium coordination
	A57D	Muscular dystrophy, limb girdle 1A ?	Nallamilli (2018) Ann Clin Transl Neurol 5, 1574	Disrupting N1 domain folding
	R68C	Muscular dystrophy, limb girdle 1A ?	Nallamilli (2018) Ann Clin Transl Neurol 5, 1574	Forming aberran intermoleculart disulfide bond?
	D95E	Muscular dystrophy, limb girdle 1A ?	Nallamilli (2018) Ann Clin Transl Neurol 5, 1574	Disrupting magnesium coordination
	T104M	Muscular dystrophy, limb girdle 1A ?	Nallamilli (2018) Ann Clin Transl Neurol 5, 1574	Disrupting N1 domain folding
	G109S	Muscular dystrophy, limb girdle 1A ?	Nallamilli (2018) Ann Clin Transl Neurol 5, 1574	Disrupting N1 domain folding
	S116N	Bethlem myopathy ?	Lampe (2005) J Med Genet 42, 108	Undefined
	V117M	Bethlem myopathy ?	Butterfield (2013) Hum Mutat 34, 1558	Disrupting N1 domain folding
	V117A	Ullrich congenital muscular dystrophy ?	Bovolenta (2010) BMC Med Genet 11, 44	Disrupting N1 domain folding
	K121R	Bethlem myopathy	Scacheri (2002) Neurology 58, 593	Undefined
	T127N	Muscular dystrophy	Sframeli (2017) Neuromuscul Disord 27, 793	Disrupting magnesium coordination
	T127A	Muscular dystrophy, limb girdle 1A ?	Nallamilli (2018) Ann Clin Transl Neurol 5, 1574	Disrupting magnesium coordination
	V156L	Muscular dystrophy, limb-girdle ?	Reddy (2017) J Hum Genet 62, 243	Undefined
	C169G	Bethlem myopathy	Panadés-de Oliveira (2019) J Neurol 266, 934	Disrupting disulfide bonding
	P198L	Muscular dystrophy, limb girdle 1A ?	Nallamilli (2018) Ann Clin Transl Neurol 5, 1574	Disrupting N1 domain folding
	I203V	Muscular dystrophy, limb girdle 1A ?	Nallamilli (2018) Ann Clin Transl Neurol 5, 1574	Undefined
	R210W	Muscular dystrophy, limb girdle 1A ?	Nallamilli (2018) Ann Clin Transl Neurol 5, 1574	Disrupting N1 domain folding
	D223N	Muscular dystrophy, limb girdle 1A ?	Nallamilli (2018) Ann Clin Transl Neurol 5, 1574	Undefined
	E251K	Muscular dystrophy, limb girdle 1A ?	Nallamilli (2018) Ann Clin Transl Neurol 5, 1574	Undefined
	G263C	Ullrich congenital muscular dystrophy	Butterfield (2013) Hum Mutat 34, 1558	Disrupting TH folding
	G269R	Ullrich congenital muscular dystrophy, intermediate	Butterfield (2013) Hum Mutat 34, 1558	Disrupting TH folding
	G269R	Ullrich congenital muscular dystrophy, intermediate	Butterfield (2013) Hum Mutat 34, 1558	Disrupting TH folding
	G269E	Ullrich congenital muscular dystrophy	Foley (2013) Brain 136, 3625	Disrupting TH folding
	G272S	Collagen VI myopathy	Kim (2018) Muscle Nerve 58, 381	Disrupting TH folding
	G272D	Bethlem myopathy	Lucioli (2005) Neurology 64, 1931	Disrupting TH folding
	G272V	Ullrich congenital muscular dystrophy	Liang (2017) PLoS One 12, e0170517	Disrupting TH folding
	P274L	Bethlem myopathy	Lampe (2005) J Med Genet 42, 108	Disrupting TH folding
	G275R	Bethlem myopathy	Lucioli (2005) Neurology 64, 1931	Disrupting TH folding
	G275E	Bethlem myopathy	Hicks (2008) Neurology 70, 1192	Disrupting TH folding
	G275W	Bethlem myopathy	Choi (2020) Clin Chim Acta 508, 28	Disrupting TH folding
	G278E	Ullrich congenital muscular dystrophy	Fan (2018) Clin Genet 93, 1159	Disrupting TH folding
	G278V	Ullrich congenital muscular dystrophy	Fan (2018) Clin Genet 93, 1159	Disrupting TH folding
	G281R	Ullrich congenital muscular dystrophy	Lampe (2005) J Med Genet 42, 108	Disrupting TH folding
	G281E	Ullrich congenital muscular dystrophy	Butterfield (2013) Hum Mutat 34, 1558	Disrupting TH folding
	G281A	Ullrich congenital muscular dystrophy, intermediate	Butterfield (2013) Hum Mutat 34, 1558	Disrupting TH folding
	G284R	Ullrich congenital muscular dystrophy	Lampe (2005) J Med Genet 42, 108	Disrupting TH folding
	G284R	Ullrich congenital muscular dystrophy, intermediate	Butterfield (2013) Hum Mutat 34, 1558	Disrupting TH folding
	G287R	Ullrich congenital muscular dystrophy, intermediate	Butterfield (2013) Hum Mutat 34, 1558	Disrupting TH folding
	G287R	Collagen VI myopathy	Briñas (2010) Ann Neurol 68, 511	Disrupting TH folding
	G287V	Ullrich congenital muscular dystrophy	Stehlíková (2017) Clin Genet 91, 463	Disrupting TH folding
	G290R	Bethlem myopathy	Lampe (2005) J Med Genet 42, 108	Disrupting TH folding
	G290R	Ullrich congenital muscular dystrophy	Giusti (2005) Ann Neurol 58, 400	Disrupting TH folding
	G290E	Collagen VI myopathy	Briñas (2010) Ann Neurol 68, 511	Disrupting TH folding
	G293R	Collagen VI myopathy	Briñas (2010) Ann Neurol 68, 511	Disrupting TH folding
	G296R	Collagen VI myopathy	Briñas (2010) Ann Neurol 68, 511	Disrupting TH folding
	G296E	Collagen VI myopathy	Briñas (2010) Ann Neurol 68, 511	Disrupting TH folding
	G296V	Collagen VI deficiency	Peat (2008) Neurology 71, 312	Disrupting TH folding
	G296W	Ullrich congenital muscular dystrophy	Fan (2018) Clin Genet 93, 1159	Disrupting TH folding
	G299R	Collagen VI myopathy	Briñas (2010) Ann Neurol 68, 511	Disrupting TH folding
	G299E	Ullrich congenital muscular dystrophy	Armaroli (2015) Eur J Paediatr Neurol 19, 533	Disrupting TH folding
	G302R	Ullrich congenital muscular dystrophy	Foley (2013) Brain 136, 3625	Disrupting TH folding
	G305V	Bethlem myopathy	Jobsis (1996) Nat Genet 14, 113	Disrupting TH folding
	G311D	Ullrich congenital muscular dystrophy, intermediate	Foley (2013) Brain 136, 3625	Disrupting TH folding
	K319N	Ullrich congenital muscular dystrophy	Okada (2007) Neurology 69, 1035	Disrupting O-glycosylation
	G341D	Bethlem myopathy	Scacheri (2002) Neurology 58, 593	Disrupting TH folding
	G341V	Bethlem myopathy	Lucioli (2005) Neurology 64, 1931	Disrupting TH folding
	S348L	Muscular dystrophy, limb girdle 1A ?	Nallamilli (2018) Ann Clin Transl Neurol 5, 1574	Disrupting TH folding?
	G359D	Bethlem myopathy	Cruz (2016) J Neuromuscul Dis 3, 267	Disrupting TH folding
	A366T	Muscular dystrophy, limb girdle 1A ?	Nallamilli (2018) Ann Clin Transl Neurol 5, 1574	Disrupting TH folding?
	E372G	Muscular dystrophy, limb girdle 1A ?	Nallamilli (2018) Ann Clin Transl Neurol 5, 1574	Disrupting TH folding
	G395V	Bethlem myopathy	Butterfield (2013) Hum Mutat 34, 1558	Disrupting TH folding
	G449D	Collagen VI myopathy	Briñas (2010) Ann Neurol 68, 511	Disrupting TH folding
	G449A	Bethlem myopathy	Butterfield (2013) Hum Mutat 34, 1558	Disrupting TH folding
	G500E	Ullrich congenital muscular dystrophy	Yuan (2013) Neurol Clin Neurosci 1, 148	Disrupting TH folding
	G512S	Thoracic ossification of the posterior longitudinal ligament	Wang (2018) Mol Med Rep 17, 2557	Disrupting TH folding
	A514T	Muscular dystrophy, limb girdle 1A ?	Nallamilli (2018) Ann Clin Transl Neurol 5, 1574	Disrupting TH folding?
	T518N	Muscular dystrophy, limb girdle 1A ?	Nallamilli (2018) Ann Clin Transl Neurol 5, 1574	Disrupting TH folding?
	E519K	Muscular dystrophy, limb girdle 1A ?	Nallamilli (2018) Ann Clin Transl Neurol 5, 1574	Forming aberrant O-glycosylation
	G526V	Muscle weakness ?	Wu (2018) Can J Neurol Sci , 1	Disrupting TH folding
	G553R	Bethlem myopathy	Panadés-de Oliveira (2019) J Neurol 266, 934	Disrupting TH folding
	A570T	Muscular dystrophy, limb girdle 1A ?	Nallamilli (2018) Ann Clin Transl Neurol 5, 1574	Disrupting TH folding?
	K571T	Bethlem myopathy	Lampe (2005) J Med Genet 42, 108	Disrupting O-glycosylation
	P588L	Ullrich congenital muscular dystrophy, intermediate	Butterfield (2013) Hum Mutat 34, 1558	Disrupting TH folding
	E595K	Muscular dystrophy, limb girdle 1A ?	Nallamilli (2018) Ann Clin Transl Neurol 5, 1574	Undefined
	P613T	Muscular dystrophy, limb girdle 1A ?	Nallamilli (2018) Ann Clin Transl Neurol 5, 1574	Disrupting C1 domain folding
	D636N	Malignant hyperthermia ?	Broman (2015) Clin Genet 88, 381	Disrupting C1/TH interaction?
	R682Q	Muscular dystrophy, limb girdle 1A ?	Nallamilli (2018) Ann Clin Transl Neurol 5, 1574	Undefined
	V684L	Muscular dystrophy, limb girdle 1A ?	Nallamilli (2018) Ann Clin Transl Neurol 5, 1574	Undefined
	R722H	Muscular dystrophy, limb girdle 1A ?	Nallamilli (2018) Ann Clin Transl Neurol 5, 1574	Disrupting C1 domain folding?
	A724T	Atrioventricular septal defect, Down-syndrome-associated	Ackerman (2012) Am J Hum Genet 91, 646	Disrupting C1 domain folding
	S732L	Muscular dystrophy, limb girdle 1A ?	Nallamilli (2018) Ann Clin Transl Neurol 5, 1574	Disrupting magnesium coordination
	G755S	Muscular dystrophy, limb girdle 1A ?	Nallamilli (2018) Ann Clin Transl Neurol 5, 1574	Disrupting C1 domain folding
	F762S	Muscular dystrophy, limb girdle 1A ?	Nallamilli (2018) Ann Clin Transl Neurol 5, 1574	Disrupting C1/N1 interaction?
	Q768H	Atrioventricular septal defect, Down-syndrome-associated	Ackerman (2012) Am J Hum Genet 91, 646	Disrupting magnesium coordination?
	R783Q	Muscular dystrophy, limb girdle 1A ?	Nallamilli (2018) Ann Clin Transl Neurol 5, 1574	Disrupting C1 domain folding
	S787L	Muscular dystrophy, limb girdle 1A ?	Nallamilli (2018) Ann Clin Transl Neurol 5, 1574	Disrupting C1 domain folding
	D835E	Spontaneous Coronary Artery Dissection	Zekavat (2022) JAMA Cardiol 7, 396	Disrupting magnesium coordination
	S842G	Ullrich congenital muscular dystrophy / Bethlem myopathy ?	Zanoteli (2020) Clin Neurol Neurosurg 192, 105734	Undefined
	A852P	Muscular dystrophy, limb girdle 1A ?	Nallamilli (2018) Ann Clin Transl Neurol 5, 1574	Disrupting C2 domain folding
	E857K	Muscular dystrophy, limb girdle 1A ?	Nallamilli (2018) Ann Clin Transl Neurol 5, 1574	Undefined
	R872W	Atrioventricular septal defect, Down-syndrome-associated	Ackerman (2012) Am J Hum Genet 91, 646	Disrupting C2 domain folding
	T881M	Muscular dystrophy, limb girdle 1A ?	Nallamilli (2018) Ann Clin Transl Neurol 5, 1574	Disrupting C2 domain folding
	E887K	Atrioventricular septal defect in Down syndrome	Ghosh (2014) Mol Cytogenet 7S1, 24	Undefined
	F893L	Ullrich congenital muscular dystrophy ?	Zanoteli (2020) Clin Neurol Neurosurg 192, 105734	Disrupting C2 domain folding
	N911S	Ullrich congenital muscular dystrophy ?	Zanoteli (2020) Clin Neurol Neurosurg 192, 105734	Disrupting C2/C2 interaction?
	A913T	Muscular dystrophy, limb-girdle ?	Yu (2017) PLoS One 12, e0175343	Undefined
	Y922C	Muscular dystrophy, limb girdle 1A ?	Nallamilli (2018) Ann Clin Transl Neurol 5, 1574	Disrupting C2 domain folding
	K937E	Muscular dystrophy, limb girdle 1A ?	Nallamilli (2018) Ann Clin Transl Neurol 5, 1574	Disrupting C2 domain folding
	A953T	Muscular dystrophy, limb girdle 1A ?	Nallamilli (2018) Ann Clin Transl Neurol 5, 1574	Undefined
	A958D	Bethlem myopathy ?	Zanoteli (2020) Clin Neurol Neurosurg 192, 105734	Disrupting C2 domain folding
	V959A	Muscular dystrophy, limb girdle 1A ?	Nallamilli (2018) Ann Clin Transl Neurol 5, 1574	Disrupting C2 domain folding
	I967V	Muscular dystrophy, limb girdle 1A ?	Nallamilli (2018) Ann Clin Transl Neurol 5, 1574	Undefined
	V985I	Muscular dystrophy, limb girdle 1A ?	Nallamilli (2018) Ann Clin Transl Neurol 5, 1574	Undefined
	G989S	Myopathy ?	Stehlíková (2017) Clin Genet 91, 463	Disrupting C2 domain folding
	Q1010R	Muscular dystrophy, limb girdle 1A ?	Nallamilli (2018) Ann Clin Transl Neurol 5, 1574	Undefined
Human COL6A2	V50M	Ullrich congenital muscular dystrophy, intermediate	Butterfield (2013) Hum Mutat 34, 1558	Disrupting N1 domain folding
	M59T	Muscular dystrophy, limb girdle 1A ?	Nallamilli (2018) Ann Clin Transl Neurol 5, 1574	Disrupting magnesium coordination
	T63M	Muscular dystrophy, limb girdle 1A ?	Nallamilli (2018) Ann Clin Transl Neurol 5, 1574	Undefined
	F77L	Muscular dystrophy, limb girdle 1A ?	Nallamilli (2018) Ann Clin Transl Neurol 5, 1574	Disrupting N1 domain folding
	E106K	Bethlem myopathy	Lampe (2005) J Med Genet 42, 108	Undefined
	S117Y	Collagen VI myopathy	Kim (2018) Muscle Nerve 58, 381	Disrupting N1 domain folding
	D135N	Bethlem myopathy	Deconinck (2015) J Neurol Neurosurg Psychiatry 86, 1337	Disrupting N1 domain folding
	T142A	Ullrich congenital muscular dystrophy / Bethlem myopathy ?	Zanoteli (2020) Clin Neurol Neurosurg 192, 105734	Disrupting N1 domain folding
	G167S	Atrioventricular septal defect ?	Xu (2018) Int J Clin Exp Pathol 11, 7	Undefined
	G171R	Muscular dystrophy, limb girdle 1A ?	Nallamilli (2018) Ann Clin Transl Neurol 5, 1574	Disrupting N1 domain folding
	E182G	Muscular dystrophy, limb girdle 1A ?	Nallamilli (2018) Ann Clin Transl Neurol 5, 1574	Disrupting N1/TH interaction?
	V190M	Muscular dystrophy, limb girdle 1A ?	Nallamilli (2018) Ann Clin Transl Neurol 5, 1574	Disrupting N1 domain folding
	E210K	Muscular dystrophy, limb girdle 1A ?	Nallamilli (2018) Ann Clin Transl Neurol 5, 1574	Disrupting N1/N1 interaction
	D215N	Epilepsy, progressive myoclonus	Karkheiran (2013) Hum Genet 132, 275	Disrupting N1 domain folding
	D227N	Atrioventricular septal defect ?	Xu (2018) Int J Clin Exp Pathol 11, 7	Disrupting N1 domain folding
	G262D	Collagen VI deficiency	Peat (2008) Neurology 71, 312	Disrupting TH folding
	R264H	Muscular dystrophy, limb girdle 1A ?	Nallamilli (2018) Ann Clin Transl Neurol 5, 1574	Undefined
	K267N	Ullrich congenital muscular dystrophy	Yuan (2013) Neurol Clin Neurosci 1, 148	Disrupting O-glycosylation
	G268S	Bethlem myopathy	Deconinck (2015) J Neurol Neurosurg Psychiatry 86, 1337	Disrupting TH folding
	G271S	Bethlem myopathy	Jobsis (1996) Nat Genet 14, 113	Disrupting TH folding
	G271D	Collagen VI deficiency	Okada (2007) Neurology 69, 1035	Disrupting TH folding
	G274V	Muscular dystrophy	Sframeli (2017) Neuromuscul Disord 27, 793	Disrupting TH folding
	G277E	Muscular dystrophy, limb-girdle	Fichna (2018) Hum Genomics 12,	Disrupting TH folding
	G277V	Muscular dystrophy	Sframeli (2017) Neuromuscul Disord 27, 793	Disrupting TH folding
	G280A	Bethlem myopathy	Huynh (2017) Muscle Nerve 55, E2	Disrupting TH folding
	G283R	Ullrich congenital muscular dystrophy	Lampe (2005) J Med Genet 42, 108	Disrupting TH folding
	G283E	Bethlem myopathy	Butterfield (2013) Hum Mutat 34, 1558	Disrupting TH folding
	G286E	Ullrich congenital muscular dystrophy	Fan (2018) Clin Genet 93, 1159	Disrupting TH folding
	G289R	Collagen VI myopathy	Briñas (2010) Ann Neurol 68, 511	Disrupting TH folding
	G289D	Muscular dystrophy	Sframeli (2017) Neuromuscul Disord 27, 793	Disrupting TH folding
	G289C	Collagen VI myopathy	Briñas (2010) Ann Neurol 68, 511	Disrupting TH folding
	G292S	Ullrich congenital muscular dystrophy	Fan (2018) Clin Genet 93, 1159	Disrupting TH folding
	G292D	Ullrich congenital muscular dystrophy, intermediate	Butterfield (2013) Hum Mutat 34, 1558	Disrupting TH folding
	G292V	Collagen VI deficiency	Okada (2007) Neurology 69, 1035	Disrupting TH folding
	G292A	Bethlem myopathy	Fortunato (2025) Biomolecules 15, 1426	Disrupting TH folding
	G295V	Collagen VI myopathy, intermediuate/Bethlem myopathy	Fortunato (2025) Biomolecules 15, 1426	Disrupting TH folding
	G295R	Bethlem myopathy	Fortunato (2025) Biomolecules 15, 1426	Disrupting TH folding
	G298E	Collagen VI myopathy, intermediuate/Bethlem myopathy	Fortunato (2025) Biomolecules 15, 1426	Disrupting TH folding
	G298R	Ullrich congenital muscular dystrophy	Pace (2008) Ann Neurol 64, 294	Disrupting TH folding
	G301S	Ullrich congenital muscular dystrophy, intermediate	Foley (2013) Brain 136, 3625	Disrupting TH folding
	G301D	Collagen VI deficiency	Okada (2007) Neurology 69, 1035	Disrupting TH folding
	G301C	Collagen VI deficiency	Okada (2007) Neurology 69, 1035	Disrupting TH folding
	G304V	Bethlem myopathy	Fortunato (2025) Biomolecules 15, 1426	Disrupting TH folding
	K318N	Muscular dystrophy	O'Grady (2016) Ann Neurol 80, 101	Disrupting O-glycosylation
	G337R	Muscular dystrophy	Sframeli (2017) Neuromuscul Disord 27, 793	Disrupting TH folding
	R351W	Muscular dystrophy, limb girdle 1A ?	Nallamilli (2018) Ann Clin Transl Neurol 5, 1574	Disrupting TH folding?
	G355C	Muscular dystrophy, limb-girdle	Nallamilli (2018) Ann Clin Transl Neurol 5, 1574	Disrupting TH folding
	P357R	Muscular dystrophy, limb girdle 1A ?	Nallamilli (2018) Ann Clin Transl Neurol 5, 1574	Disrupting TH folding
	G379E	Ullrich congenital muscular dystrophy	Fan (2018) Clin Genet 93, 1159	Disrupting TH folding
	G394E	Collagen VI myopathy	Briñas (2010) Ann Neurol 68, 511	Disrupting TH folding
	K441E	Bethlem myopathy ?	Wang (2020) Hum Genet 139, 473	Disrupting O-glycosylation
	D446N	Muscular dystrophy, limb-girdle, with prominent scapular atrophy ?	Punetha (2016) J Neuromuscul Dis 3, 209	Disrupting TH folding?
	D446H	Muscular dystrophy, limb girdle 1A ?	Nallamilli (2018) Ann Clin Transl Neurol 5, 1574	Disrupting TH folding?
	R453H	Muscular dystrophy, limb-girdle ?	Punetha (2016) J Neuromuscul Dis 3, 209	Disrupting TH folding?
	R468L	Muscular dystrophy, limb girdle 1A ?	Nallamilli (2018) Ann Clin Transl Neurol 5, 1574	Disrupting TH folding?
	G484R	Collagen VI myopathy	Briñas (2010) Ann Neurol 68, 511	Disrupting TH folding
	R498H	Ullrich congenital muscular dystrophy	Lampe (2005) J Med Genet 42, 108	Disrupting TH folding?
	G499R	Ullrich congenital muscular dystrophy	Fan (2018) Clin Genet 93, 1159	Disrupting TH folding
	G531S	Ullrich congenital muscular dystrophy	Zanoteli (2020) Clin Neurol Neurosurg 192, 105734	Disrupting TH folding
	G531R	Ullrich congenital muscular dystrophy	Lampe (2005) J Med Genet 42, 108	Disrupting TH folding
	E536K	Muscular dystrophy, limb girdle 1A ?	Nallamilli (2018) Ann Clin Transl Neurol 5, 1574	Forming aberrant O-glycosylation
	R539Q	Ullrich congenital muscular dystrophy	Zhang (2014) World J Pediatr 10, 126	Disrupting TH folding?
	G540D	Ullrich congenital muscular dystrophy	Fortunato (2025) Biomolecules 15, 1426	Disrupting TH folding
	K554R	Muscular dystrophy ?	Chae (2015) J Med Genet 52, 208	Disrupting O-glycosylation
	P568S	Muscular dystrophy, limb girdle 1A ?	Nallamilli (2018) Ann Clin Transl Neurol 5, 1574	Disrupting TH folding
	G582D	Muscular dystrophy, limb-girdle	Yu (2017) PLoS One 12, e0175343	Disrupting TH folding
	G588S	Muscular dystrophy, limb girdle 1A ?	Nallamilli (2018) Ann Clin Transl Neurol 5, 1574	Disrupting TH folding
	T590M	Bethlem myopathy	Hicks (2008) Neurology 70, 1192	Disrupting inter-TH interaction?
	V594I	Bethlem myopathy ?	Wang (2020) Hum Genet 139, 473	Undefined
	E600K	Collagen VI myopathy	Briñas (2010) Ann Neurol 68, 511	Disrupting C1/C1 interaction
	D606N	Bethlem myopathy	Fan (2018) Clin Genet 93, 1159	Disrupting C1 domain folding
	D606H	Ullrich congenital muscular dystrophy	Fan (2018) Clin Genet 93, 1159	Disrupting C1 domain folding
	C611Y	Bethlem myopathy	Fortunato (2025) Biomolecules 15, 1426	Disrupting disulfide bonding
	D621N	Bethlem myopathy	Scacheri (2002) Neurology 58, 593	Disrupting magnesium coordination
	S623A	Bethlem myopathy	Fortunato (2025) Biomolecules 15, 1426	Disrupting magnesium coordination
	E624K	Ullrich congenital muscular dystrophy	Zhang (2010) J Biol Chem 285, 10005	Disrupting magnesium coordination
	R644S	Cerebral palsy, modifier of ?	Pingel (2019) Am J Med Genet B Neuropsychiatr Genet 180, 12	Disrupting C1 domain folding
	R659C	Muscular dystrophy, limb-girdle	Özyilmaz (2019) Ann Hum Genet 83, 331	Disrupting C1 domain folding
	S666N	Bethlem myopathy ?	Hicks (2008) Neurology 70, 1192	Disrupting C1 domain folding
	T670N	Muscular dystrophy, limb girdle 1A ?	Nallamilli (2018) Ann Clin Transl Neurol 5, 1574	Disrupting C1 domain folding?
	T670I	Ullrich congenital muscular dystrophy / Bethlem myopathy ?	Zanoteli (2020) Clin Neurol Neurosurg 192, 105734	Disrupting C1 domain folding
	R680H	Lower waist-to-hip ratio, association with	Emdin (2019) Diabetes 68, 226	Disrupting C1 domain folding
	F687S	Collagen VI myopathy, intermediuate/Bethlem myopathy	Fortunato (2025) Biomolecules 15, 1426	Disrupting C1 domain folding
	E695K	Muscular dystrophy, limb girdle 1A ?	Nallamilli (2018) Ann Clin Transl Neurol 5, 1574	Disrupting C1/N1 interaction
	G699D	Bethlem myopathy	Hermanns-Lê (2014) Ultrastruct Pathol 38, 164	Disrupting C1/N1 interaction
	G700S	Bethlem myopathy	Lampe (2005) J Med Genet 42, 108	Disrupting C1/N1 interaction
	T701N	Muscular dystrophy, Emery-Dreifuss ?	Meinke (2020) EBioMedicine 51,	Disrupting magnesium coordination
	T703P	Late onset limb-girdle muscular dystrophy	Jokela (2019) J Neurol 266, 1649	Disrupting C1 domain folding
	A706T	Bethlem myopathy	Deconinck (2015) J Neurol Neurosurg Psychiatry 86, 1337	Disrupting C1 domain folding
	A710D	Muscular dystrophy, limb girdle 1A ?	Nallamilli (2018) Ann Clin Transl Neurol 5, 1574	Disrupting C1 domain folding
	R724L	Muscular dystrophy, limb girdle 1A ?	Nallamilli (2018) Ann Clin Transl Neurol 5, 1574	Disrupting C1 domain folding?
	R724C	Cerebral palsy, modifier of ?	Pingel (2019) Am J Med Genet B Neuropsychiatr Genet 180, 12	Forming aberran intermoleculart disulfide bond?
	V728M	Atrioventricular septal defect, Down-syndrome-associated	Ackerman (2012) Am J Hum Genet 91, 646	Disrupting C1 domain folding
	T731M	Bethlem myopathy	Foley (2013) Brain 136, 3625	Disrupting magnesium coordination
	G733R	Muscular dystrophy, limb girdle 1A ?	Nallamilli (2018) Ann Clin Transl Neurol 5, 1574	Disrupting C1 domain folding
	L747Q	Bethlem myopathy	Fortunato (2025) Biomolecules 15, 1426	Disrupting C1 domain folding
	C748Y	Muscular dystrophy, limb girdle 1A ?	Nallamilli (2018) Ann Clin Transl Neurol 5, 1574	Disrupting disulfide bonding
	V752I	Bethlem myopathy ?	Wang (2020) Hum Genet 139, 473	Undefined
	C777R	Ullrich congenital muscular dystrophy	Lampe (2005) J Med Genet 42, 108	Disrupting disulfide bonding
	R784H	Ullrich congenital muscular dystrophy	Lampe (2005) J Med Genet 42, 108	Disrupting C1 domain folding?
	V824M	Cleft lip and/or palate ?	Pengelly (2016) Sci Rep 6, 30457	Disrupting C2 domain folding?
	R830Q	Bethlem myopathy	Gualandi (2009) Neurology 73, 1883	Disrupting intermolecular C2/C1 interaction
	R830W	Bethlem myopathy	Foley (2009) Neuromuscul Disord 19, 813	Disrupting intermolecular C2/C1 interaction
	L837P	Ullrich congenital muscular dystrophy	Baker (2005) Hum Mol Genet 14, 279	Disrupting C2 domain folding
	R843Q	Atrioventricular septal defect, Down-syndrome-associated	Ackerman (2012) Am J Hum Genet 91, 646	Disrupting C2/C2 interaction
	R843W	Bethlem myopathy	Gualandi (2009) Neurology 73, 1883	Disrupting C2/C2 interaction
	E846K	Muscular dystrophy, limb girdle 1A ?	Nallamilli (2018) Ann Clin Transl Neurol 5, 1574	Undefined
	R853Q	Bethlem myopathy ?	Lampe (2005) J Med Genet 42, 108	Disrupting C2 domain folding
	R862Q	Muscular dystrophy, limb girdle 1A ?	Nallamilli (2018) Ann Clin Transl Neurol 5, 1574	Disrupting C2 domain folding
	R862W	Bethlem myopathy	Elmas (2018) Mol Biol Rep 46, 287	Disrupting C2 domain folding
	R867W	Ullrich congenital muscular dystrophy, intermediate	Butterfield (2013) Hum Mutat 34, 1558	Undefined
	D869Y	Muscular dystrophy, limb girdle 1A ?	Nallamilli (2018) Ann Clin Transl Neurol 5, 1574	Disrupting C2 domain folding
	D870N	Muscular dystrophy, limb girdle 1A ?	Nallamilli (2018) Ann Clin Transl Neurol 5, 1574	Disrupting C2 domain folding
	D871N	Bethlem myopathy	Gualandi (2009) Neurology 73, 1883	Disrupting C2 domain folding
	R876S	Ullrich congenital muscular dystrophy	Lampe (2005) J Med Genet 42, 108	Disrupting C2 domain folding
	R876H	Bethlem myopathy	Foley (2013) Brain 136, 3625	Disrupting C2 domain folding
	A904V	Muscular dystrophy, limb girdle 1A ?	Nallamilli (2018) Ann Clin Transl Neurol 5, 1574	Disrupting C2 domain folding
	V929M	Muscular dystrophy, limb girdle 1A ?	Nallamilli (2018) Ann Clin Transl Neurol 5, 1574	Disrupting C2 domain folding
	P932L	Bethlem myopathy ?	Baker (2007) Ann Neurol 62, 390	Disrupting C2 domain folding?
	R933H	Atrioventricular septal defect ?	Xu (2018) Int J Clin Exp Pathol 11, 7	Undefined
	R937W	Muscular dystrophy, limb girdle 1A ?	Nallamilli (2018) Ann Clin Transl Neurol 5, 1574	Disrupting C2 domain folding
	A940E	Myopathy, early-onset ?	Vill (2017) J Neuromuscul Dis 4, 315	Disrupting C2 domain folding
	E959Q	Muscular dystrophy, limb girdle 1A ?	Nallamilli (2018) Ann Clin Transl Neurol 5, 1574	Undefined
	S960L	Muscular dystrophy, limb girdle 1A ?	Nallamilli (2018) Ann Clin Transl Neurol 5, 1574	Disrupting C2 domain folding
	R965P	Muscular dystrophy, limb girdle 1A ?	Nallamilli (2018) Ann Clin Transl Neurol 5, 1574	Disrupting C2 domain folding; Disrupting intermolecular C2/C1 interaction
	R965C	Muscular dystrophy, limb girdle 1A ?	Nallamilli (2018) Ann Clin Transl Neurol 5, 1574	Disrupting C2 domain folding; Disrupting intermolecular C2/C1 interaction
	P971L	Collagen VI myopathy	Briñas (2010) Ann Neurol 68, 511	Disrupting C2 domain folding
	G977S	Muscular dystrophy, limb girdle 1A ?	Nallamilli (2018) Ann Clin Transl Neurol 5, 1574	Disrupting C2 domain folding?
	D979N	Muscular dystrophy, limb girdle 1A ?	Nallamilli (2018) Ann Clin Transl Neurol 5, 1574	Disrupting C2 domain folding
	V984M	Muscular dystrophy, limb girdle 1A ?	Nallamilli (2018) Ann Clin Transl Neurol 5, 1574	Disrupting C2 domain folding
	T987M	Muscular dystrophy, limb girdle 1A ?	Nallamilli (2018) Ann Clin Transl Neurol 5, 1574	Undefined
	L988V	Muscular dystrophy, limb girdle 1A ?	Nallamilli (2018) Ann Clin Transl Neurol 5, 1574	Undefined
	R1016C	Muscular dystrophy, limb girdle 1A ?	Nallamilli (2018) Ann Clin Transl Neurol 5, 1574	Disrupting C2/C2 interaction?
	W1017R	Bethlem myopathy	Deconinck (2015) J Neurol Neurosurg Psychiatry 86, 1337	Disrupting C2 domain folding; Disrupting C2/C1 interaction
Human COL6A3	A1638T	Ullrich congenital muscular dystrophy, intermediate	Butterfield (2013) Hum Mutat 34, 1558	Disrupting N2 domain folding
	L1643R	Bethlem myopathy ?	Gualandi (2011) Muscle Nerve 44, 80	Disrupting N2 domain folding
	R1660C	Collagen VI myopathy	Marakhonov (2018) Gene 672, 165	Forming aberran intermoleculart disulfide bond?
	D1674N	Ullrich congenital muscular dystrophy ?	Lampe (2005) J Med Genet 42, 108	Disrupting N2 domain folding
	G1679E	Bethlem myopathy	Pan (1998) Hum Mol Genet 7, 807	Disrupting N2 domain folding
	G1679W	Bethlem myopathy	Foley (2013) Brain 136, 3625	Disrupting N2 domain folding
	N1707K	Cerebral palsy, modifier of ?	Pingel (2019) Am J Med Genet B Neuropsychiatr Genet 180, 12	Undefined
	H1725P	Bethlem myopathy	Cao (2014) Zhonghua Yi Xue Yi Chuan Xue Za Zhi 31, 698	Disrupting N2 domain folding
	L1726R	Bethlem myopathy	Baker (2007) Ann Neurol 62, 390	Disrupting N2 domain folding
	R1742Q	Muscular dystrophy, limb girdle 1A ?	Nallamilli (2018) Ann Clin Transl Neurol 5, 1574	Undefined
	K1754R	Ullrich congenital muscular dystrophy, intermediate ?	Foley (2013) Brain 136, 3625	Undefined
	L1841P	Muscular dystrophy, limb girdle 1A ?	Nallamilli (2018) Ann Clin Transl Neurol 5, 1574	Disrupting N1 domain folding
	G1842R	Bethlem myopathy	Foley (2013) Brain 136, 3625	Disrupting N1 domain folding
	G1842E	Bethlem myopathy	Deconinck (2015) J Neurol Neurosurg Psychiatry 86, 1337	Disrupting N1 domain folding
	A1864T	Muscular dystrophy, limb girdle 1A ?	Nallamilli (2018) Ann Clin Transl Neurol 5, 1574	Undefined
	G1879S	Muscular dystrophy, limb girdle 1A ?	Nallamilli (2018) Ann Clin Transl Neurol 5, 1574	Disrupting N1 domain folding
	R1886C	Bethlem myopathy	Lévesque (2016) Orphanet J Rare Dis 11, 8	Forming aberran intermoleculart disulfide bond?
	P1894S	Muscular dystrophy, limb girdle 1A ?	Nallamilli (2018) Ann Clin Transl Neurol 5, 1574	Disrupting N1 domain folding?
	S1941L	Muscular dystrophy, limb girdle 1A ?	Nallamilli (2018) Ann Clin Transl Neurol 5, 1574	Undefined
	P1942L	Muscular dystrophy, limb girdle 1A ?	Nallamilli (2018) Ann Clin Transl Neurol 5, 1574	Disrupting N1 domain folding?
	V1945L	Muscular dystrophy, limb girdle 1A ?	Nallamilli (2018) Ann Clin Transl Neurol 5, 1574	Undefined
	R1970C	Bethlem myopathy	Deconinck (2015) J Neurol Neurosurg Psychiatry 86, 1337	Disrupting N1/N1 interaction
	V1985M	Bethlem myopathy	Lampe (2005) J Med Genet 42, 108	Disrupting N1 domain folding
	G2044R	Ullrich congenital muscular dystrophy, intermediate	Foley (2013) Brain 136, 3625	Disrupting TH folding
	G2047D	Bethlem myopathy	Lampe (2005) J Med Genet 42, 108	Disrupting TH folding
	G2047C	Bethlem myopathy	Foley (2013) Brain 136, 3625	Disrupting TH folding
	K2052N	Bethlem myopathy	Fortunato (2025) Biomolecules 15, 1426	Disrupting O-glycosylation
	G2053D	Bethlem myopathy	Fan (2018) Clin Genet 93, 1159	Disrupting TH folding
	G2053V	Ullrich congenital muscular dystrophy, intermediate	Butterfield (2013) Hum Mutat 34, 1558	Disrupting TH folding
	G2053C	Bethlem myopathy	Collins (2012) Neurology 79, 2158	Disrupting TH folding
	G2056R	Bethlem myopathy	Pepe (1999) Neuromuscul Disord 9, 264	Disrupting TH folding
	G2059C	Bethlem myopathy	Butterfield (2013) Hum Mutat 34, 1558	Disrupting TH folding
	Y2063C	Collagen VI myopathy	Kim (2018) Muscle Nerve 58, 381	Forming aberran intermoleculart disulfide bond?
	G2065S	Muscular dystrophy, limb girdle 1A ?	Nallamilli (2018) Ann Clin Transl Neurol 5, 1574	Disrupting TH folding
	G2065D	Ullrich congenital muscular dystrophy	Pace (2008) Ann Neurol 64, 294	Disrupting TH folding
	G2065V	Muscular dystrophy	Sframeli (2017) Neuromuscul Disord 27, 793	Disrupting TH folding
	E2067K	Bethlem myopathy	Foley (2013) Brain 136, 3625	Forming aberrant O-glycosylation
	G2071D	Muscular dystrophy	Sframeli (2017) Neuromuscul Disord 27, 793	Disrupting TH folding
	G2074D	Ullrich congenital muscular dystrophy	Pace (2008) Ann Neurol 64, 294	Disrupting TH folding
	G2074C	Collagen VI myopathy	Briñas (2010) Ann Neurol 68, 511	Disrupting TH folding
	P2075L	Ullrich congenital muscular dystrophy	Butterfield (2013) Hum Mutat 34, 1558	Disrupting TH folding
	G2077R	Ullrich congenital muscular dystrophy	Butterfield (2013) Hum Mutat 34, 1558	Disrupting TH folding
	G2077D	Ullrich congenital muscular dystrophy, intermediate	Butterfield (2013) Hum Mutat 34, 1558	Disrupting TH folding
	G2080D	Bethlem myopathy	Lampe (2005) J Med Genet 42, 108	Disrupting TH folding
	G2080C	Ullrich congenital muscular dystrophy	Foley (2013) Brain 136, 3625	Disrupting TH folding
	G2089R	Muscular dystrophy	Sframeli (2017) Neuromuscul Disord 27, 793	Disrupting TH folding
	G2095V	Collagen VI deficiency	Peat (2008) Neurology 71, 312	Disrupting TH folding
	G2098V	Bethlem myopathy	Butterfield (2013) Hum Mutat 34, 1558	Disrupting TH folding
	G2122V	Bethlem myopathy	Foley (2014) J Neurol Neurosurg Psychiatry 85, 1012	Disrupting TH folding
	R2136S	Muscular dystrophy, limb girdle 1A ?	Nallamilli (2018) Ann Clin Transl Neurol 5, 1574	Disrupting TH folding?
	A2257T	Muscular dystrophy, limb girdle 1A ?	Nallamilli (2018) Ann Clin Transl Neurol 5, 1574	Disrupting TH folding?
	R2271K	Muscular dystrophy	Vasli (2012) Acta Neuropathol 124, 273	Disrupting TH folding?
	E2274K	Bethlem myopathy	Fortunato (2025) Biomolecules 15, 1426	Disrupting TH folding?
	R2287W	Recurrent pregnancy loss ?	Quintero-Ronderos (2017) PLoS One 12, e0186149	Disrupting TH folding?
	R2290C	Muscular dystrophy, limb girdle 1A ?	Nallamilli (2018) Ann Clin Transl Neurol 5, 1574	Disrupting TH folding?; Disrupting inter-TH interaction
	G2291R	Ullrich congenital muscular dystrophy	Fortunato (2025) Biomolecules 15, 1426	Disrupting TH folding
	G2297A	Unusual progressive limb girdle muscular dystrophy 2A	Nallamilli (2018) Ann Clin Transl Neurol 5, 1574	Disrupting TH folding
	G2311R	Ullrich congenital muscular dystrophy	Butterfield (2013) Hum Mutat 34, 1558	Disrupting TH folding
	G2344E	Muscular dystrophy	Sframeli (2017) Neuromuscul Disord 27, 793	Disrupting TH folding
	P2349S	Muscular dystrophy, limb girdle 1A ?	Nallamilli (2018) Ann Clin Transl Neurol 5, 1574	Disrupting TH folding
	G2356R	Ullrich congenital muscular dystrophy	Fortunato (2025) Biomolecules 15, 1426	Disrupting TH folding
	D2372N	Muscular dystrophy, limb girdle 1A ?	Nallamilli (2018) Ann Clin Transl Neurol 5, 1574	Disrupting C2 cleavage?
	G2392R	Inflammatory myopathy	Papa (2018) Scand J Rheumatol 47, 166	Disrupting C1 domain folding
	V2398I	Muscular dystrophy, limb-girdle ?	Fichna (2018) Hum Genomics 12,	Undefined
	F2418L	Collagen VI myopathy, intermediuate/Bethlem myopathy	Fortunato (2025) Biomolecules 15, 1426	Disrupting C1 domain folding
	R2420W	Muscular dystrophy, limb-girdle ?	Fichna (2018) Hum Genomics 12,	Disrupting C1 domain folding
	R2422G	Muscular dystrophy, limb girdle 1A ?	Nallamilli (2018) Ann Clin Transl Neurol 5, 1574	Disrupting C1 domain folding
	L2432P	Muscular dystrophy	Sframeli (2017) Neuromuscul Disord 27, 793	Disrupting C1 domain folding
	R2459Q	Collagen VI myopathy ?	Nallamilli (2018) Ann Clin Transl Neurol 5, 1574	Disrupting C1 domain folding
	R2459W	Muscular dystrophy, limb girdle 1A ?	Nallamilli (2018) Ann Clin Transl Neurol 5, 1574	Disrupting C1 domain folding
	K2483E	Collagen VI myopathy	Briñas (2010) Ann Neurol 68, 511	Disrupting C1 domain folding?
	A2490T	Bethlem myopathy	Fortunato (2025) Biomolecules 15, 1426	Disrupting C1 domain folding
	R2501H	Dystonia	Zech (2015) Am J Hum Genet 96, 883	Disrupting intramolecular C1/C2 interaction
	G2505R	Muscular dystrophy, limb girdle 1A ?	Nallamilli (2018) Ann Clin Transl Neurol 5, 1574	Disrupting C1/C1 interaction
	A2536V	Muscular dystrophy, limb girdle 1A ?	Nallamilli (2018) Ann Clin Transl Neurol 5, 1574	Disrupting C1 domain folding
	A2554T	Dystonia	Zech (2015) Am J Hum Genet 96, 883	Disrupting C1 domain folding
	V2562A	Muscular dystrophy ?	Verma (2018) J Clin Neuromuscul Dis 19, 108	Disrupting C2 cleavage
	I2593F	Muscular dystrophy, limb girdle 1A ?	Nallamilli (2018) Ann Clin Transl Neurol 5, 1574	Disrupting C1 domain folding
	D2625Y	Atrioventricular septal defect, Down-syndrome-associated	Ackerman (2012) Am J Hum Genet 91, 646	Disrupting C2 domain folding
	A2670V	Neuromuscular disorder	Ankala (2015) Ann Neurol 77, 206	Disrupting C2 domain folding
	A2678T	Muscular dystrophy, limb girdle 1A ?	Nallamilli (2018) Ann Clin Transl Neurol 5, 1574	Undefined
	I2723T	Muscular dystrophy ?	Punetha (2016) J Neuromuscul Dis 3, 209	Disrupting C2 domain folding
	A2730D	Muscular dystrophy, limb girdle 1A ?	Nallamilli (2018) Ann Clin Transl Neurol 5, 1574	Disrupting C2 domain folding
	K2737Q	Atrioventricular septal defect, Down-syndrome-associated	Ackerman (2012) Am J Hum Genet 91, 646	Disrupting C2 domain folding
	E2746K	Atrioventricular septal defect, Down-syndrome-associated	Ackerman (2012) Am J Hum Genet 91, 646	Disrupting C2 domain folding?
	P2748L	Muscular dystrophy, limb girdle 1A ?	Nallamilli (2018) Ann Clin Transl Neurol 5, 1574	Disrupting C2 domain folding
	V2770M	Muscular dystrophy, limb girdle 1A ?	Nallamilli (2018) Ann Clin Transl Neurol 5, 1574	Disrupting C2 domain folding
	K2796I	Ullrich congenital muscular dystrophy / Bethlem myopathy ?	Zanoteli (2020) Clin Neurol Neurosurg 192, 105734	Disrupting intramolecular C2/C1 interaction
	K2796E	Myopathy, early-onset ?	Vill (2017) J Neuromuscul Dis 4, 315	Disrupting intramolecular C2/C1 interaction
	V2798A	Muscular dystrophy, limb girdle 1A ?	Nallamilli (2018) Ann Clin Transl Neurol 5, 1574	Disrupting C2 domain folding
	R2811C	Muscular dystrophy	Sframeli (2017) Neuromuscul Disord 27, 793	Disrupting C2 cleavage
