# Supplementary material
Source: Research Square preprint supplement (doi:10.21203/rs.3.rs-9685219/v1)
Supplement: Supplementary file 1 [file 1d6c2708525d57dec501b086.docx]

**Supplementary information**

**
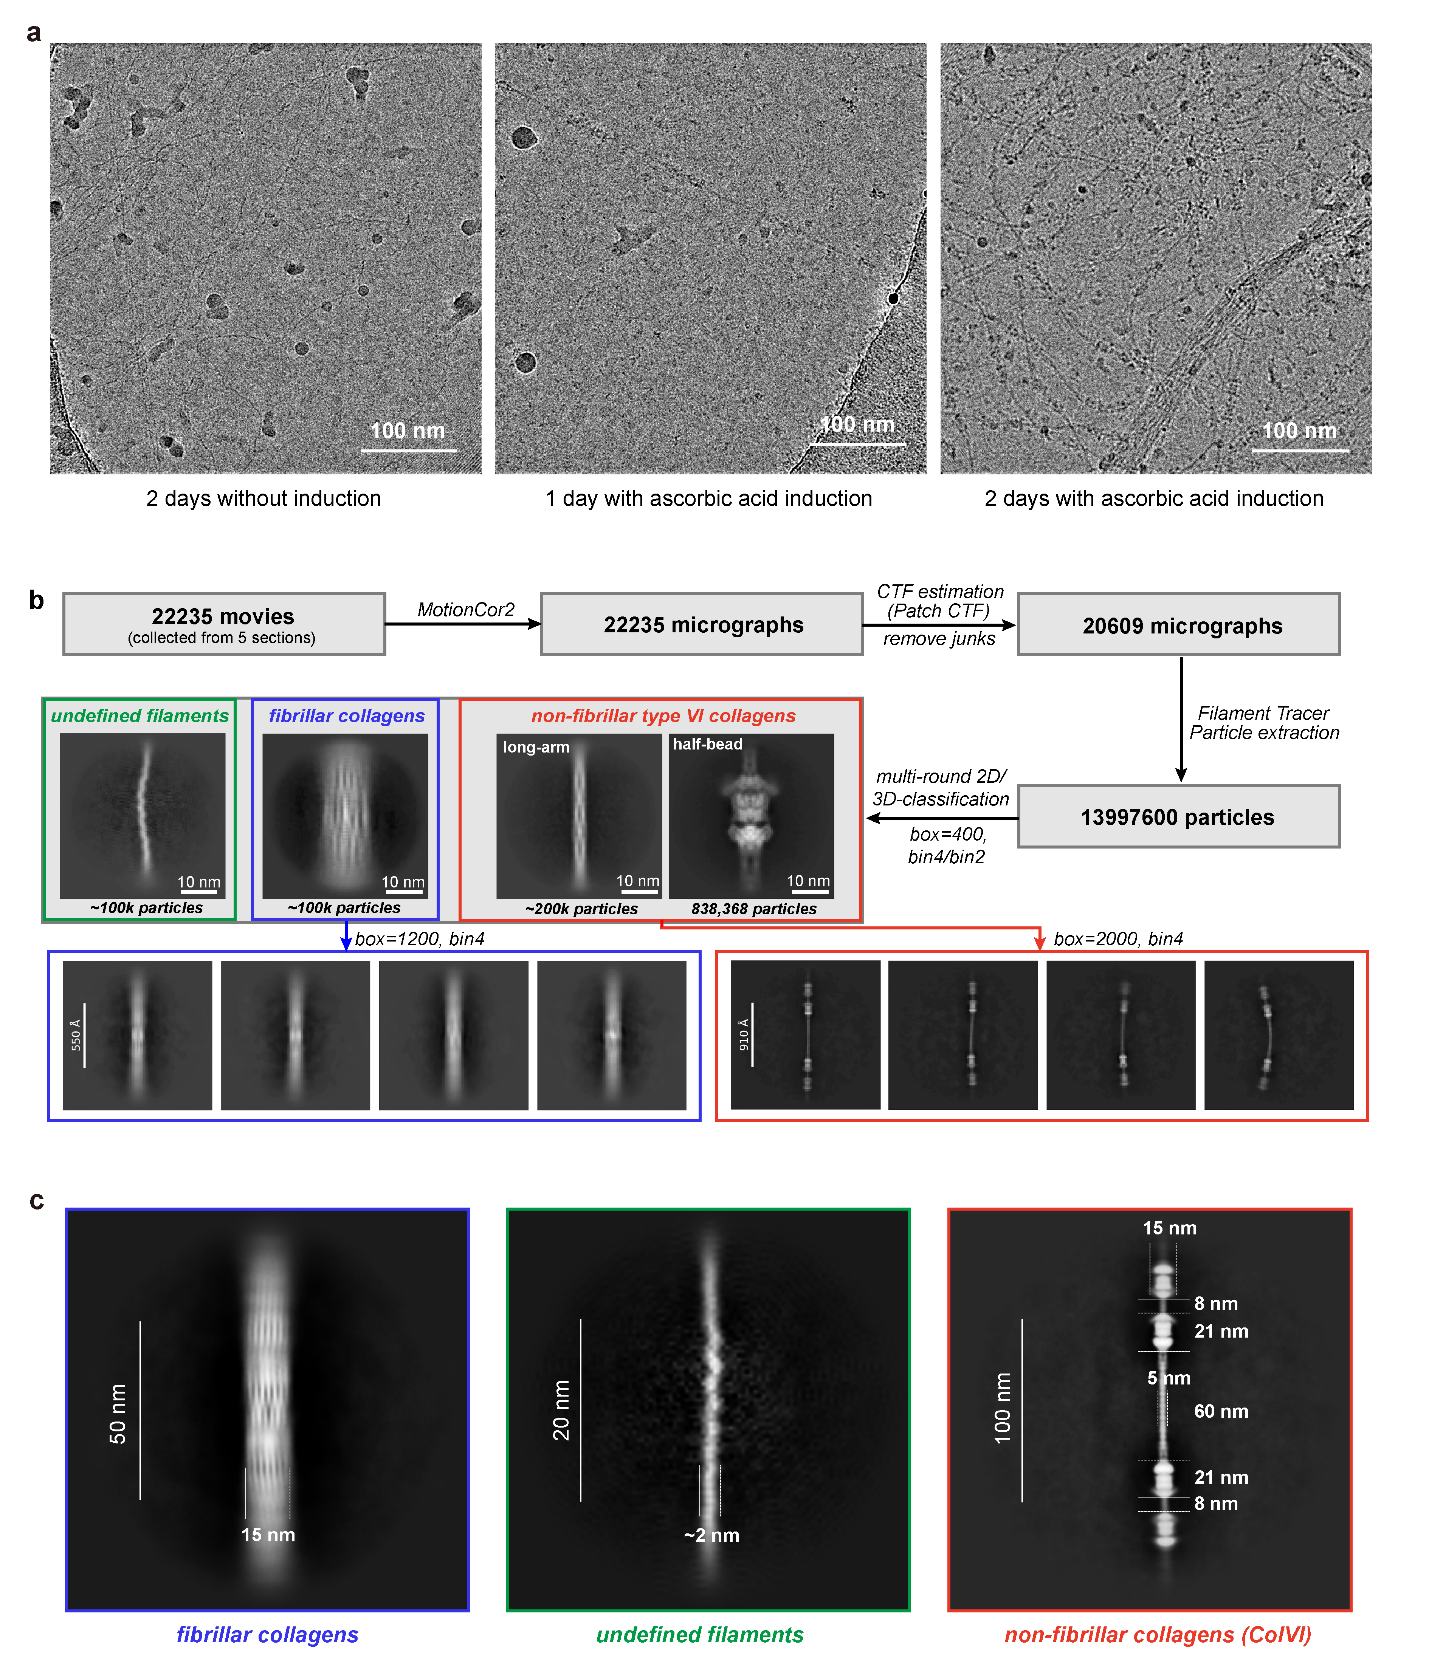
**

**Fig. S1. Cryo-EM preparation and analyses of ECM samples from HFF cells.**

**(a)** Cryo-EM observations of ECM samples from HFF cells, which were prepared under different conditions.

**(b)** Cryo-EM analysis procedures for ECM samples from HFF cells. Particles in these samples were classified into three types based on their characteristic shapes.

**(c)** Cryo-EM 2D-classification results demonstrating that three distinct filamentous structures were captured in these ECM samples. The diameters of fibrillar collagens and undefined filaments, and the length of each region of the ColVI microfibril, are indicated.

**
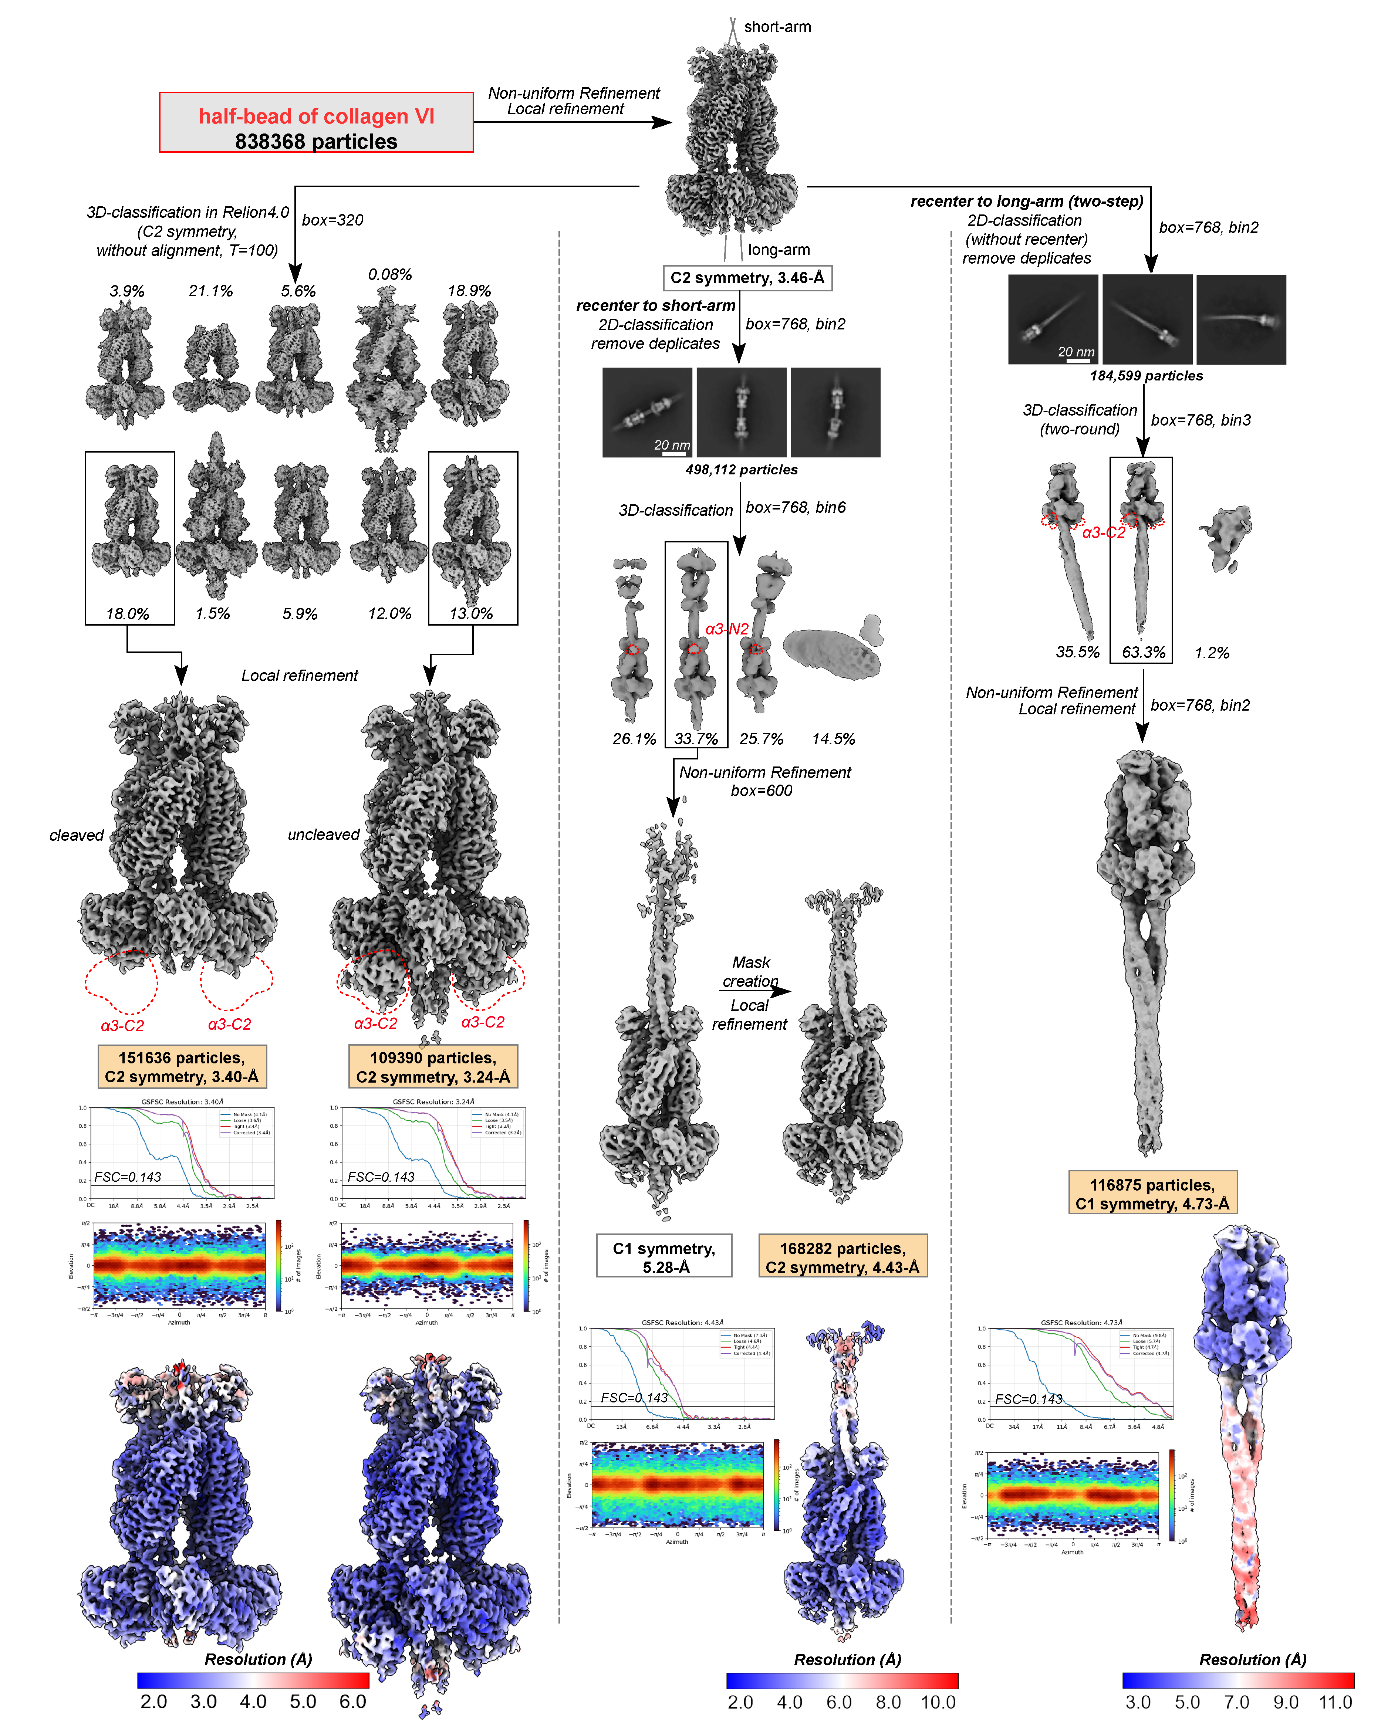
**

**Fig. S2. Cryo-EM structure determination of the ColVI microfibril.**

Stepwise procedures for cryo-EM map generation of three regions in the ColVI microfibril, including the half-bead, the half-bead plus short arm, and the half-bead plus long arm. Notably, for the half-bead region, two distinct cryo-EM maps were obtained. One containing the α3C2 domains (circled with red dashed lines) and the other without these domains. For the half-bead plus short/long-arm regions, the dynamically changing α3N2 and α3C2 domains, along with the swing motion of the two arms, are also indicated, respectively.

**
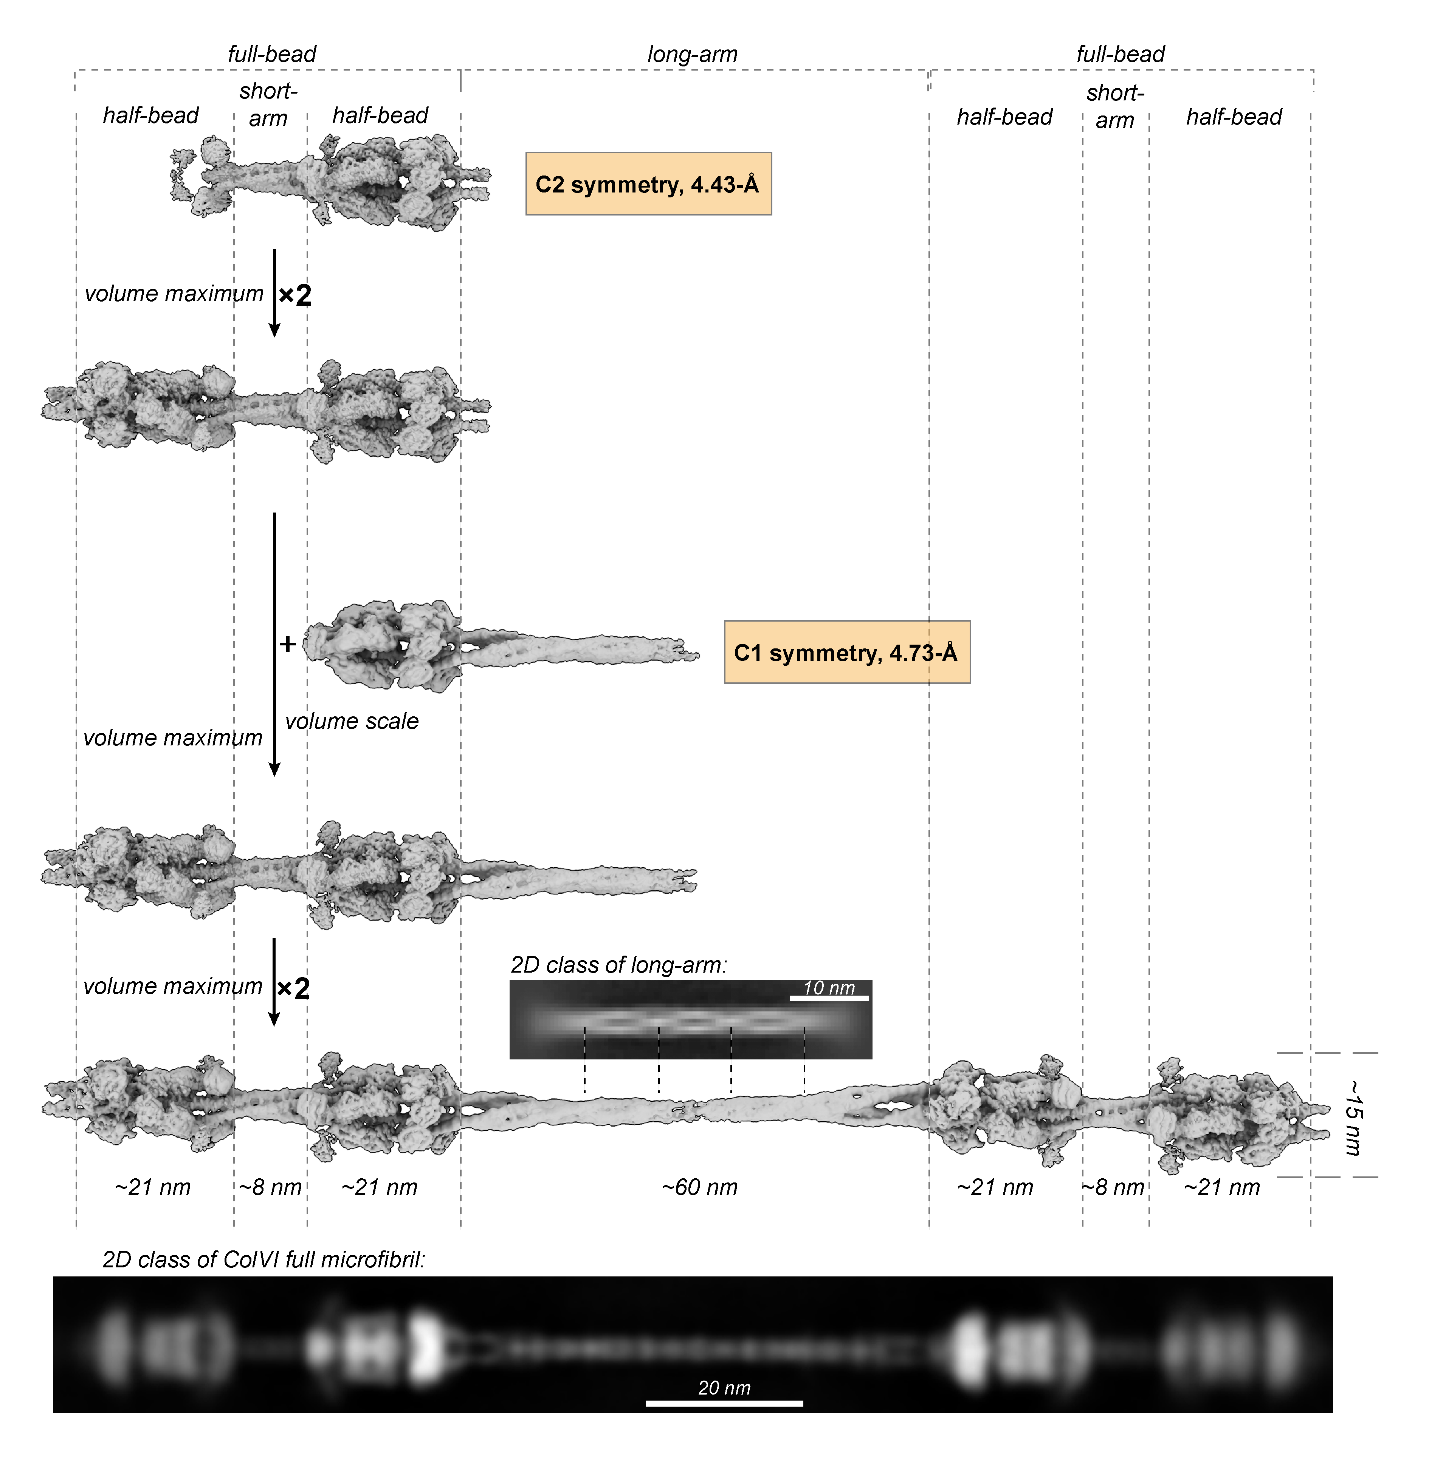
**

**Fig. S3. Stepwise procedures for generating the composite map of the ColVI microfibril.**

The 2D classification results for the long-arm region and the microfibril are presented as a guide for slight adjustments to map orientations.

**
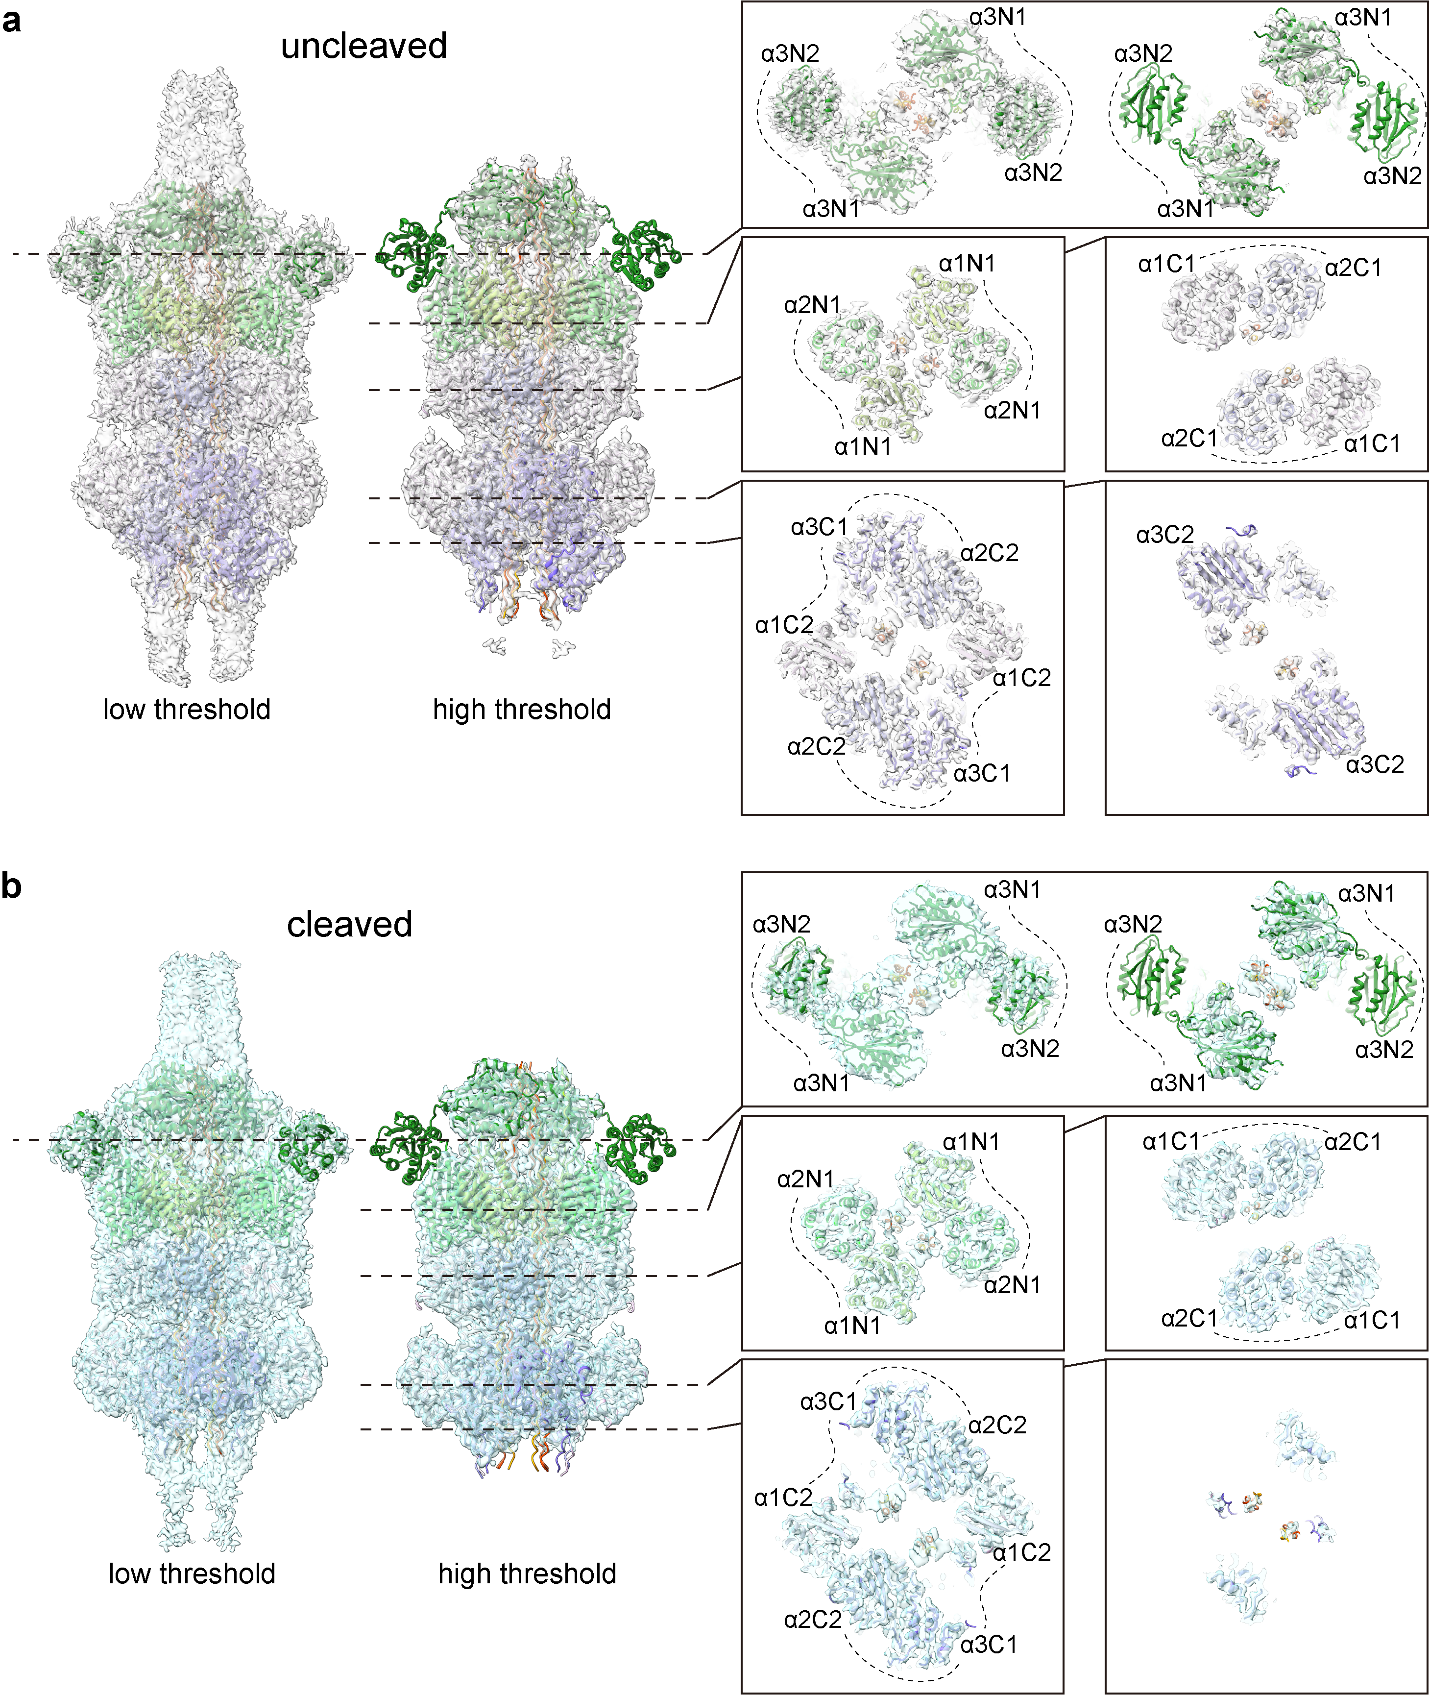
**

**Fig. S4. Structural representations of the half-beads in the uncleaved (a) and cleaved (b) states.**

Both half-bead structures are shown in a model-in-map mode. The cryo-EM density map is displayed in parallel at two contour levels: a low threshold (contour level, 0.2) and a high threshold (contour level, 0.5). Five cross-sections are selected for each state to illustrate the density distribution. In the right panel, domains linked by a dotted line belong to the same collagen monomer.

**
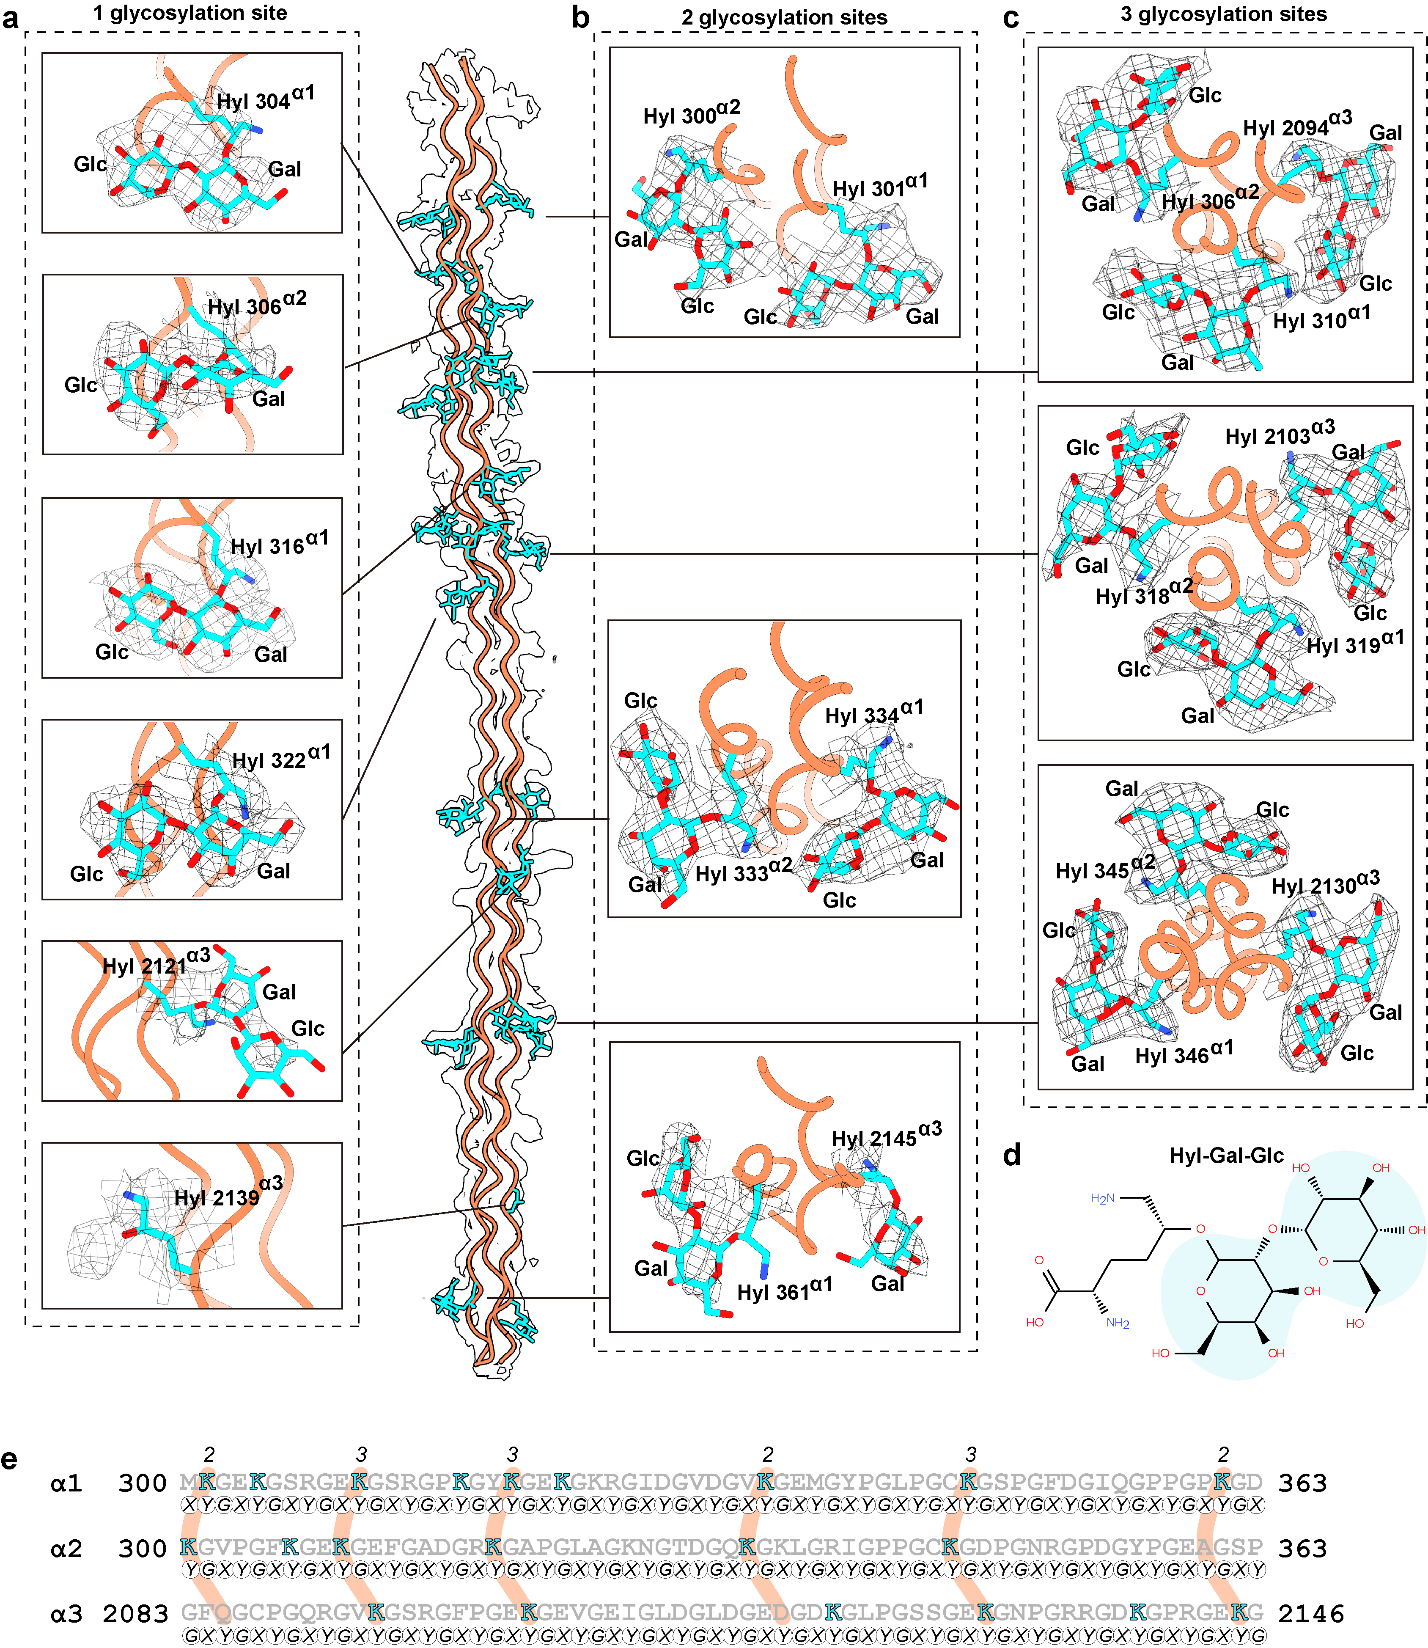
Fig. S5. Local densities of glycosylated hydroxlysines in a traversing TH.**

**(a-c)** Local cryo-EM densities of glycosylated Hyls in TH layers with one-site (**a**), two-site (**b**), and three-site (**c**) glycosylation. The map contour level is 0.35, except that the level is 0.15 for Hyl 2121 and Hyl2139. Despite the relatively smear density around Hyl2139 preventing the assignment of the disaccharide group to this residue, the extra density surrounding its sidechain supports the O-glycosylation of Hyl2139.

**(d)** Molecular diagram of O-glycosylated Hyl. The disaccharide groups are indicated by light green shadows.

**(e)** Amino acid sequence of the traversing TH, with repeated “Gly-X-Y” (G-X-Y) motifs indicated. Glycosylated Hyls are highlighted in cyan, while TH layers with two or three-site glycosylation are marked with salmon-colored belts.

**
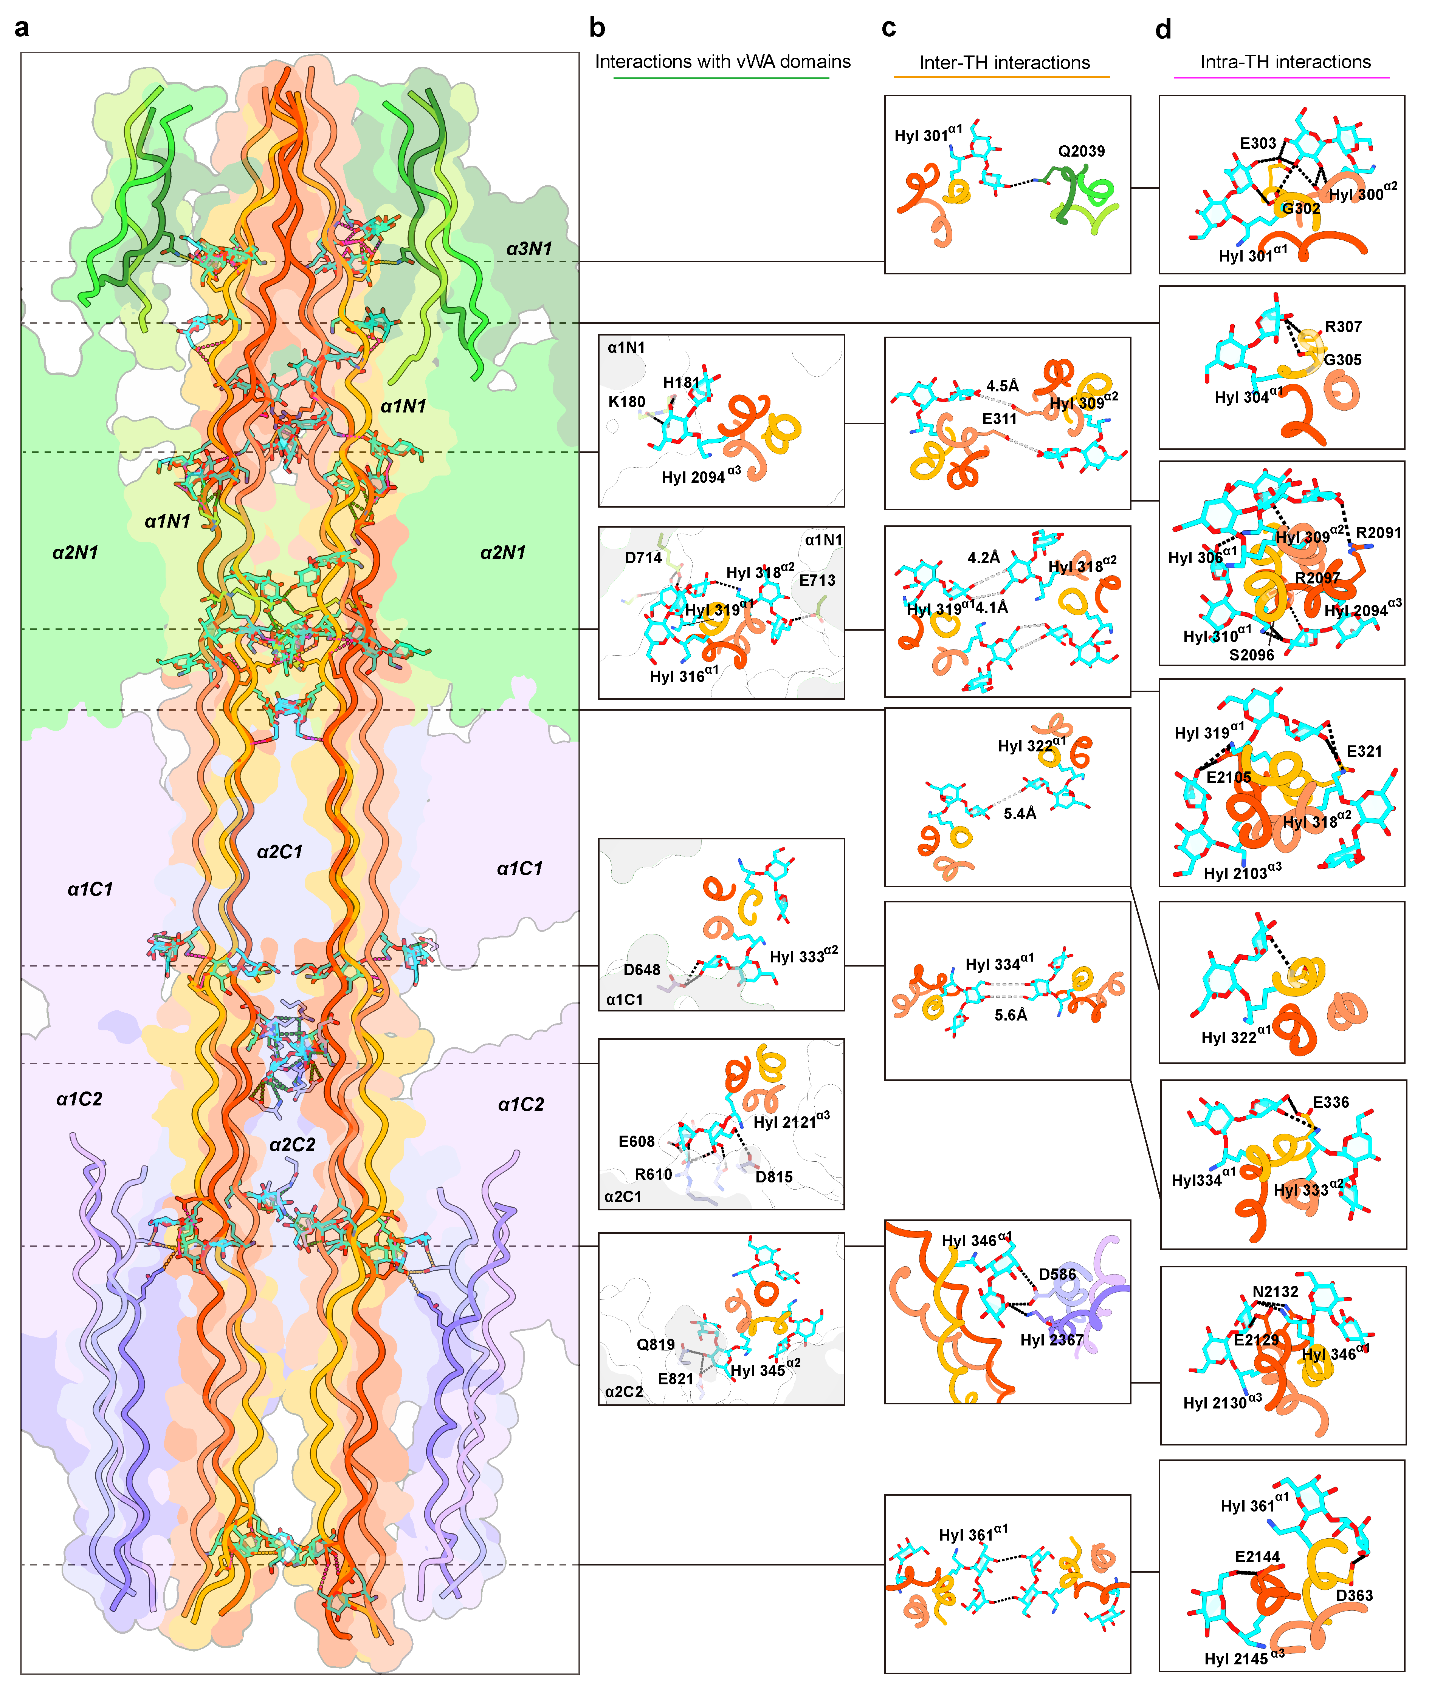
**

**Fig. S6. Atomic views of interactions mediated by Hyl O-glycosylation in the half-bead.**

**(a**) Overall view of glycosylated Hyls in the THs of the half-bead in the uncleaved state. Glycosylated Hyls are shown as cyan sticks, THs as cartoons, and the vWAs as surfaces.

**(b-d)** Atomic views of interactions between the traversing THs and vWA domains (**b**), as well as inter-TH (**c**) and intra-TH (**d**) interactions.

**
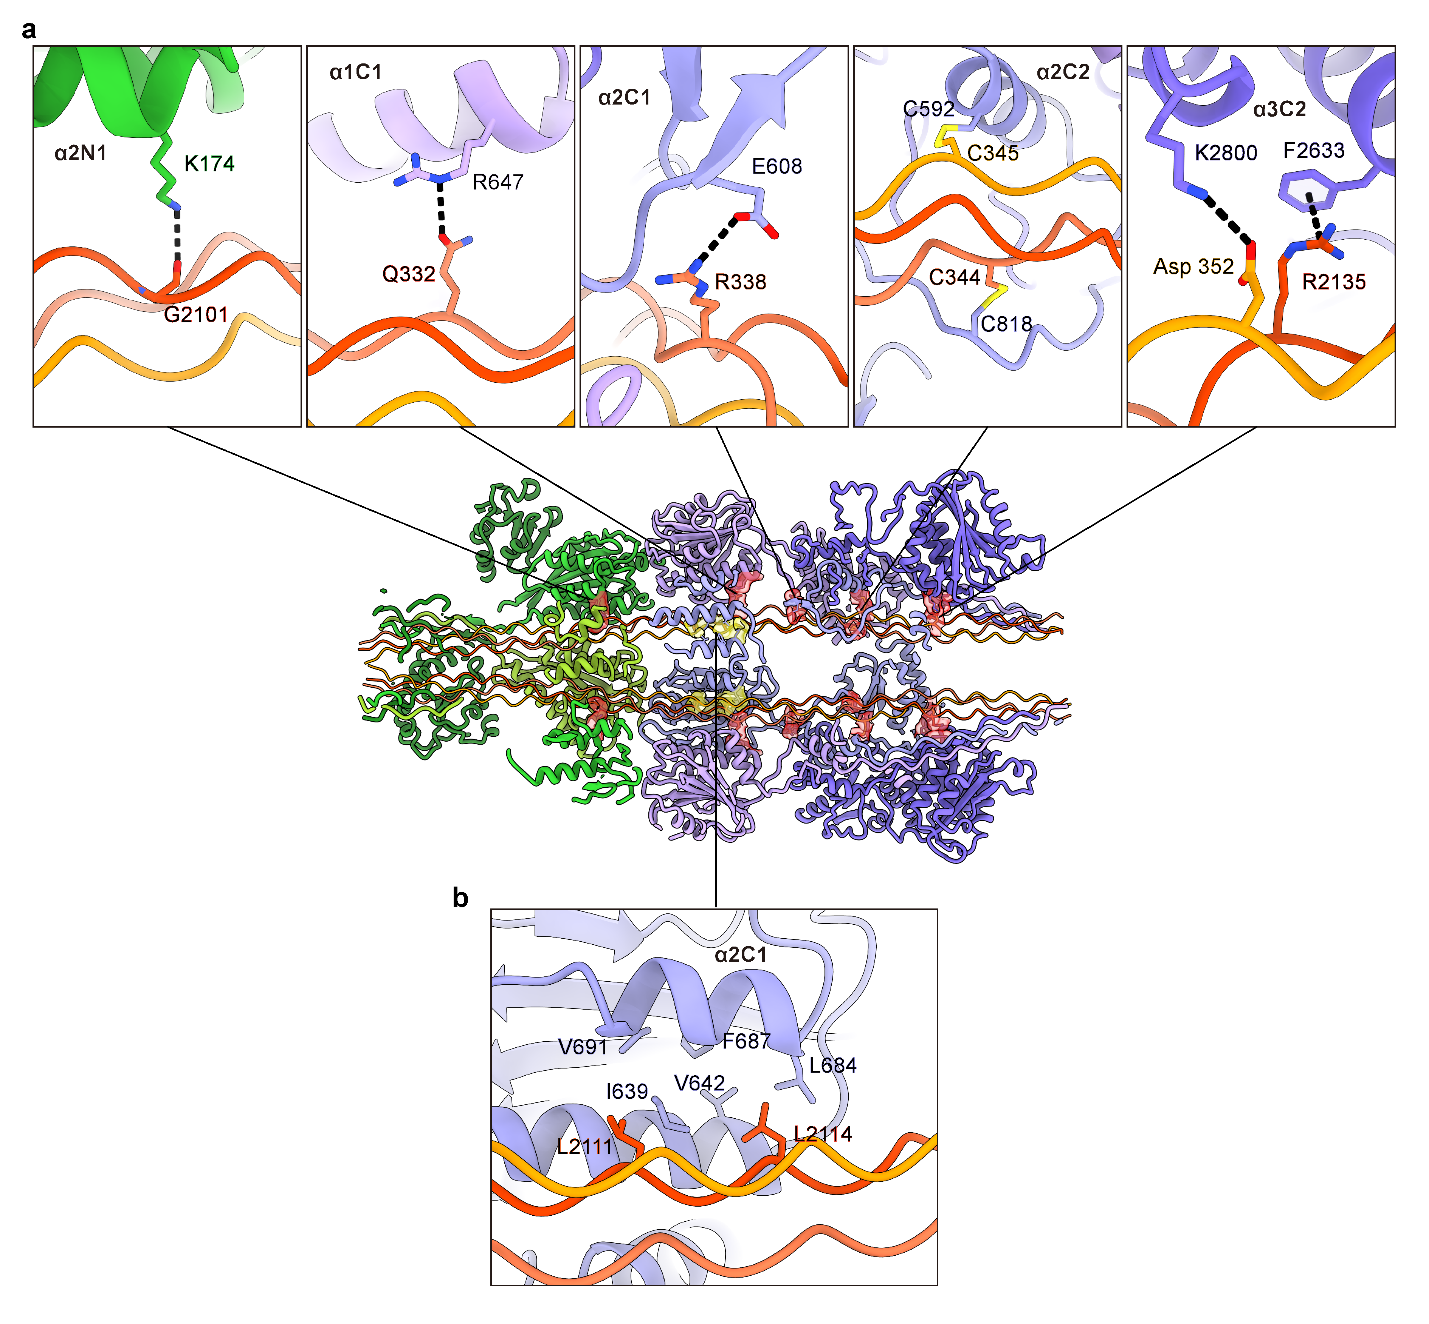
**

**Fig. S7. Non-Hyl residues involved in interactions** **between THs and vWA domains in the half-bead.**

**(a)** Atomic views of polar contacts and disulfide linkages between the traversing THs and vWA domains.

**(b)** Atomic views of hydrophobic interactions between the traversing THs and vWA domains.

**
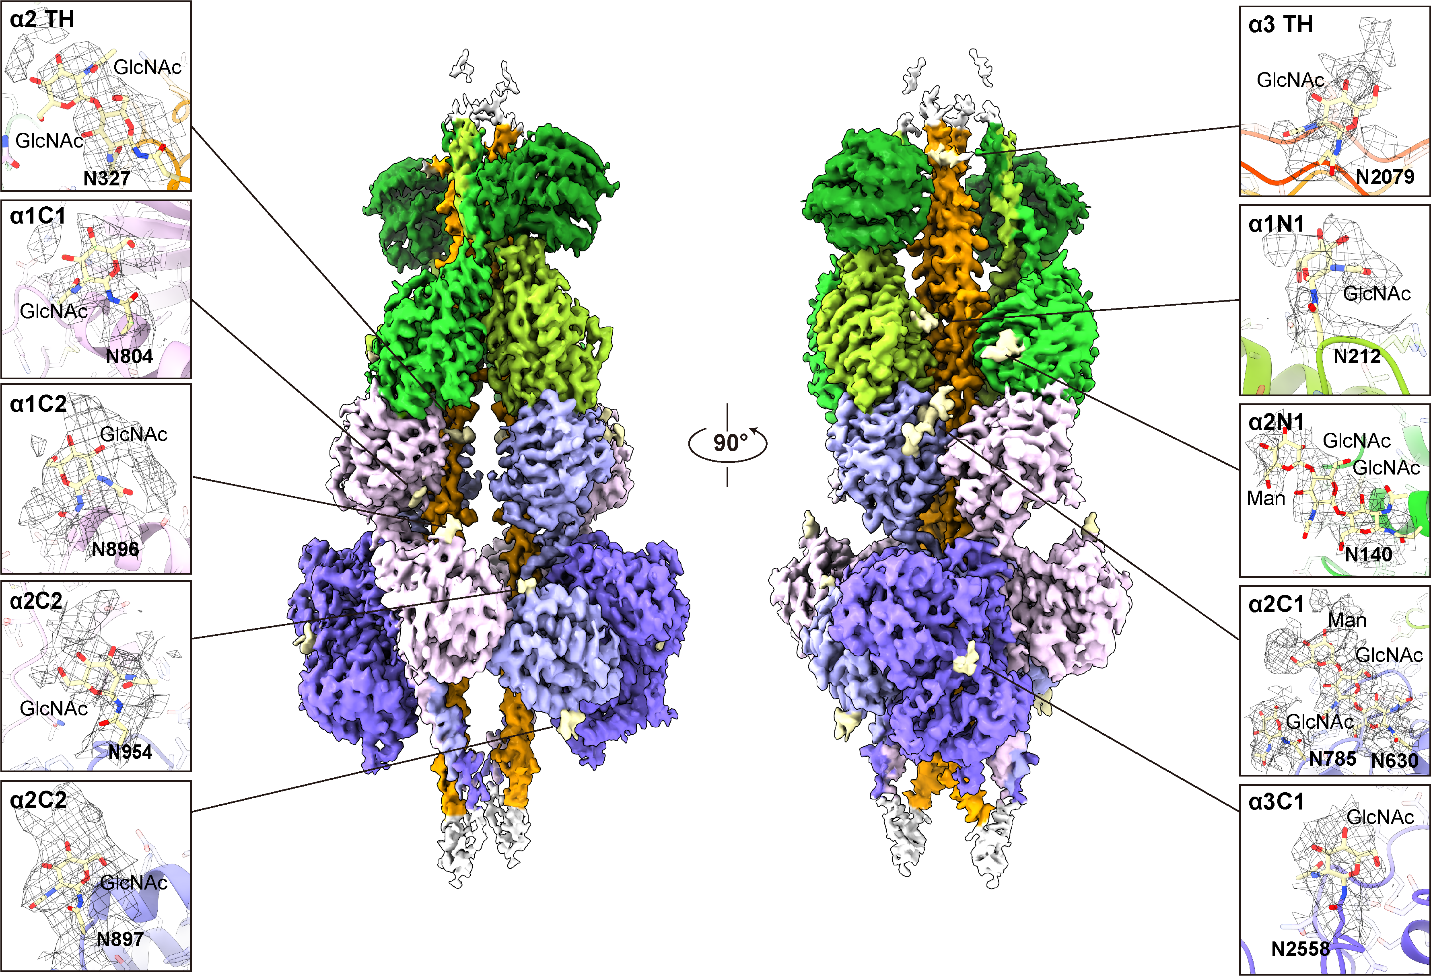
**

**Fig. S8. Local densities of NAG modifications in the half-bead.**

The overall cryo-EM density map (contour level, 0.3) of the half-bead in the uncleaved state is shown. The local densities are zoom-in shown in a model-in-map mode, where NAG moieties are displayed as light-yellow sticks. All glycosylation sites and the corresponding glycosyl groups are labeled.

**
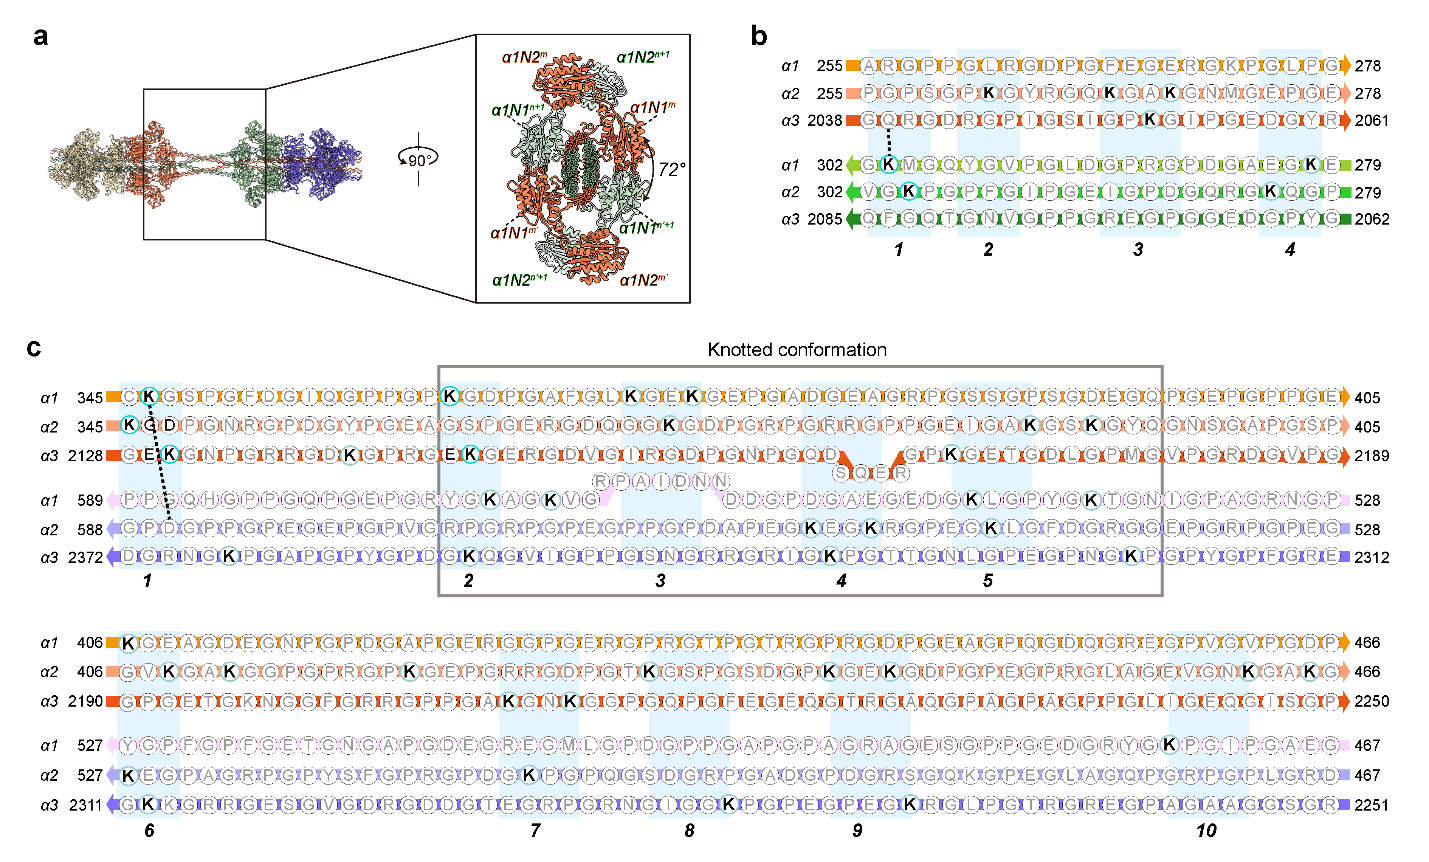
**

**Fig. S9. TH-mediated assembly of the short and long arms in the ColVI microfibril.**

**(a**) The structure of the full bead. A rotated view is provided to display a ~72° rotation between the two half-beads within one full bead.

**(b,c)** Amino acid sequences of the α1, α2, and α3 subunits of ColVI in the short-arm (**b**) and long-arm (**c**) regions. Potential glycosylated Hyl residues are highlighted and supercoil layers are indicated in transparent cyan boxes. The knotted conformation in the long arm is boxed, with two collagenous sequence interruptions indicated.

**
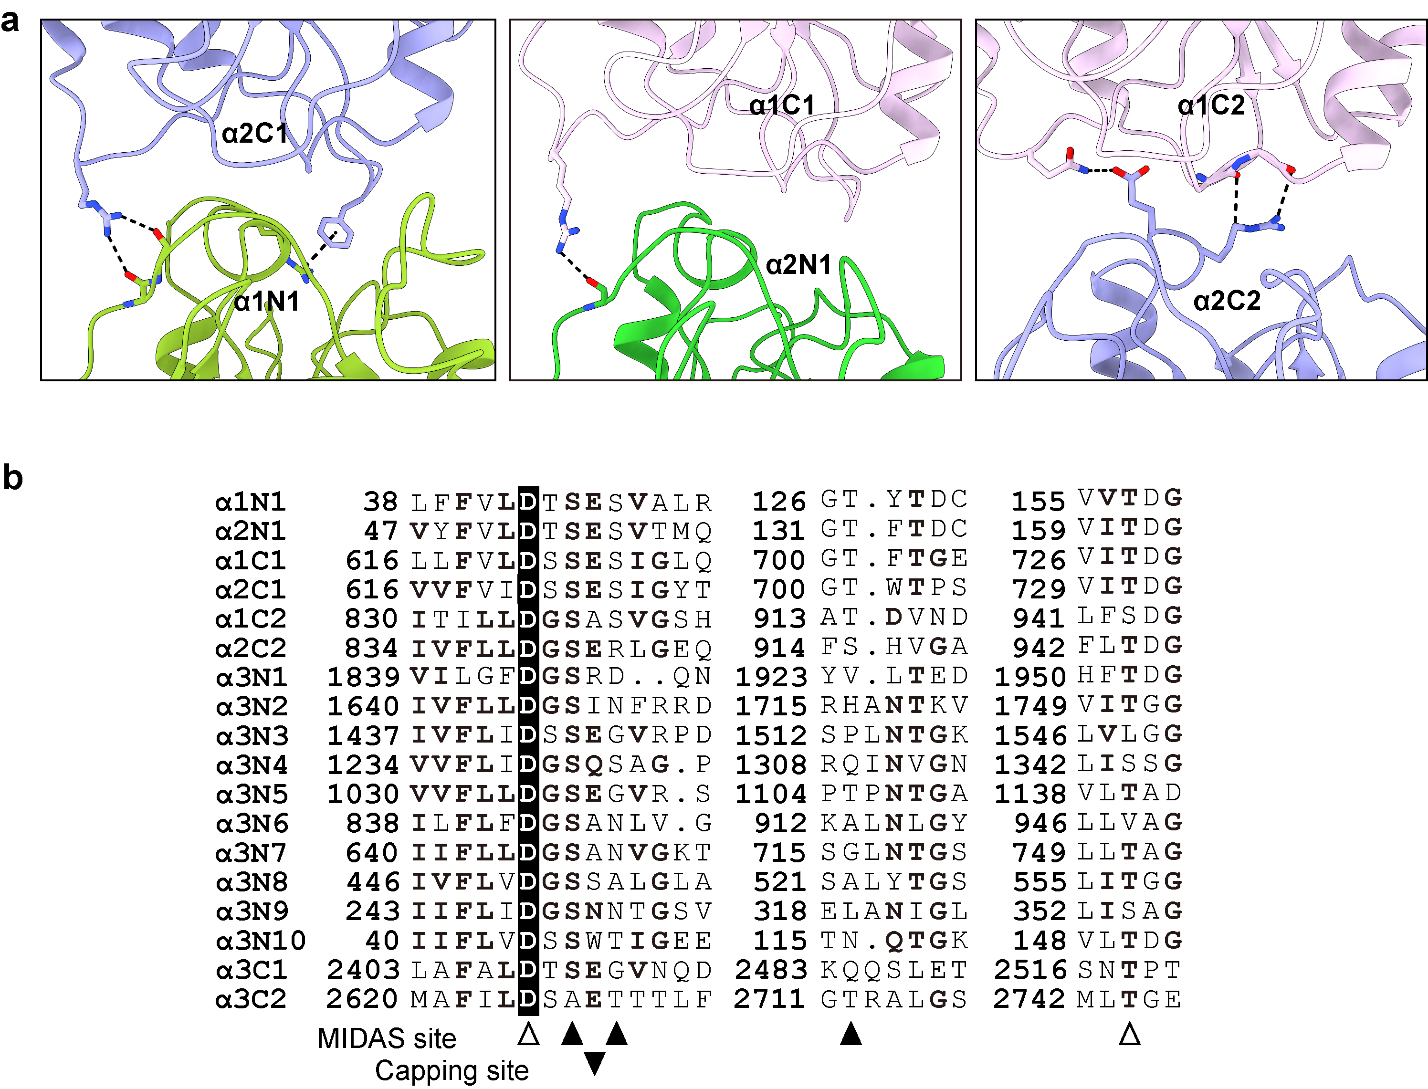
**

**Fig. S10. The vWA/vWA interactions** **in the formation of the half-bead.**

**(a)** Non-Mg2+-coordination-mediated interactions between the indicated vWA domains. Very limited contacts were observed in the half-bead.

**(b)** Sequence alignment of all vWA domains in ColVI. The MIDAS and capping sites are only conserved in the vWA domains mediating half-bead assembly.

**
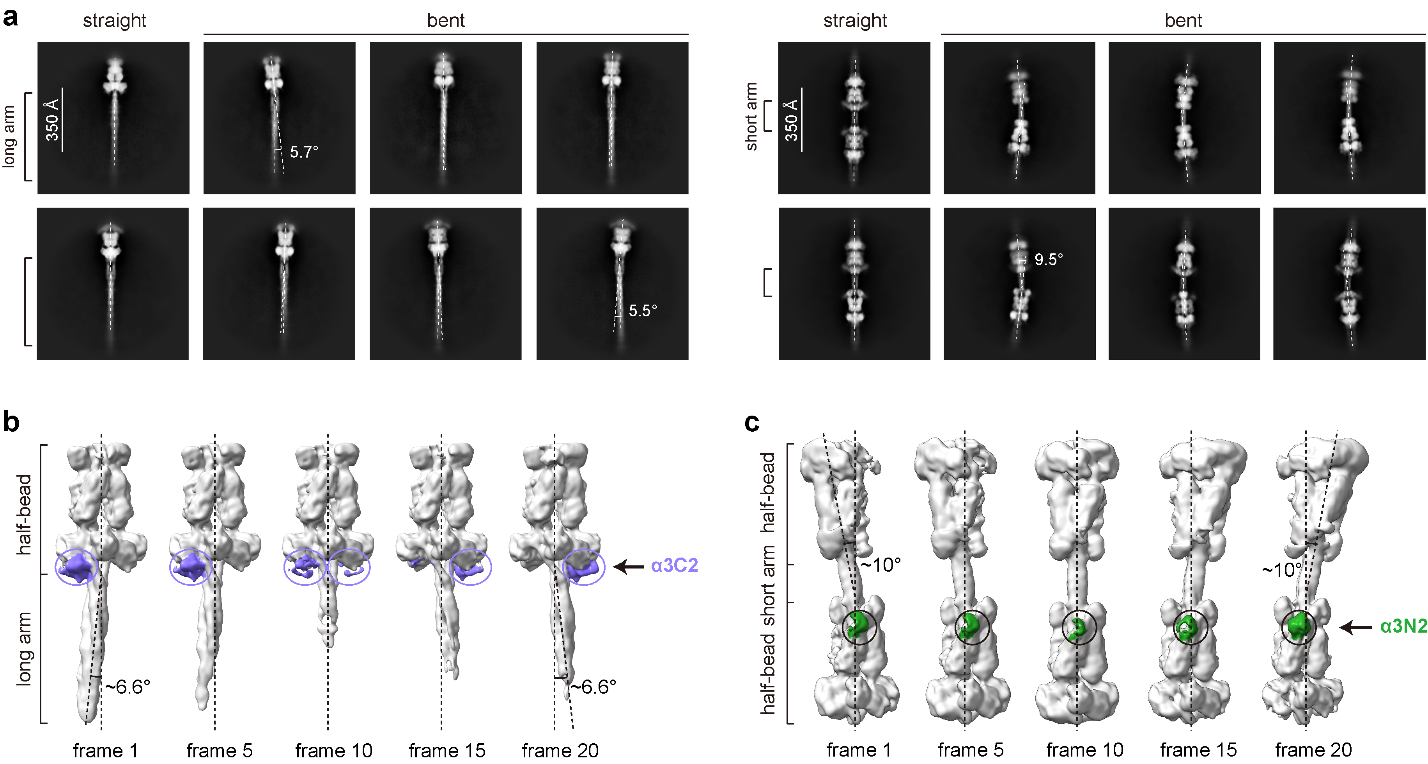
**

**Fig. S11. Structural flexibility of the long and short arms in the ColVI microfibril.**

**(a)** 2D classification results illustrating the swing of both the long arm between two full-beads and the short arm between two half-beads. The longitudinal axis of each half-bead is indicated with a dashed line.

**(b)** 3DVA results illustrating the swing of the long arm. Five representative frame maps (frames 1, 5, 10, 15, and 20) are aligned using the density of the half-bead connecting to the long arm. The longitudinal axis in each frame is indicated by a dashed line. The density of the α3C2 domain in each frame is colored and circled.

(**c**) 3DVA results illustrating the swing of the short arm. Five representative frame maps, (frames 1, 5, 10, 15, and 20) are aligned using the density of the bottom half-bead. The longitudinal axis of the bottom half-bead in each frame is indicated by a dashed line. An up to ~10° swing of the top half-bead is observed (frames 1 and 20). The density of the α3N2 domain in each frame is colored and circled.
