# Supplementary material
Source: Research Square preprint supplement (doi:10.21203/rs.3.rs-9685219/v1)
Supplement: Supplementary file 2 [file 5a4854413464a241baddddda.docx]

**Table S1. The statistics of cryo-EM data collection, process, model refinement, and validation.**

| **Data collection and process** | **Collagen-VI** | | | |
| --- | --- | --- | --- | --- |
| Microscope | Titan Krios G3i | | | |
| Detector | Ganta K3 | | | |
| Voltage(keV) | 300 | | | |
| Magnification | 81000× | | | |
| Total electron exposure (e- /Å2) | 50 | | | |
| Exposure time (s) | 3.0 | | | |
| Electron exposure per frame (e- /Å2) | 1.56 | | | |
| Defocus range (μm) | -1.5 to -2.5 | | | |
| Pixel size (Å) | 0.5475 | | | |
| Initial particle images (no.) | 838368 | | | |
|  | Half-bead  (cleaved) | Half-bead  (uncleaved) | Half-bead  plus  short-arm | Half-bead  plus  long-arm |
| Final particle images (no.) | 151636 | 109390 | 168282 | 116875 |
| Map resolution (Å) | 3.40 | 3.24 | 4.43 | 4.73 |
| FSC threshold | 0.143 | 0.143 | 0.143 | 0.143 |
| Map resolution range (Å) | 2.3-6.9 | 2.3-6.7 | 2.5-10.6 | 3.5-11.8 |
| Map sharpening B factor (Å2) | -122.7 | -107.1 | -177.1 | -160.7 |
| Symmetry imposed | C2 | C2 | C2 | C1 |
| **Model building and refinement** | | | | |
|  | Half-bead  (cleaved) | Half-bead  (uncleaved) | Full microfibril | |
| Initial model used (PDB code) | PDB: 9GTU and AlphaFold3-predicted models | | | |
| Model composition | | | | |
| Non-hydrogen atoms | 35284 | 39566 | 179568 | |
| Protein residues | 4431 | 4970 | 23016 | |
| Ligands | 114 | 120 | 484 | |
| R.M.S.D. from ideal geometry | | | | |
| Bond lengths (Å) | 0.009 | 0.005 | 0.004 | |
| Bond angles (°) | 0.904 | 0.741 | 0.907 | |
| **Validation** | | | | |
| CC_mask | 0.78 | 0.82 | 0.64 | |
| Clashscore | 10.66 | 8.47 | 5.05 | |
| MolProbity score | 1.79 | 1.77 | 1.77 | |
| **Ramachandran plot statistics** | | | | |
| Favored (%) | 96.30 | 95.53 | 91.63 | |
| Allowed (%) | 3.70 | 4.47 | 7.80 | |
| Disallowed (%) | 0 | 0 | 0.57 | |
